# Supplementary material for: Comparative proteomic analyses of Duchenne muscular dystrophy and Becker muscular dystrophy muscles: changes contributing to preserve muscle function in Becker muscular dystrophy patients
Source: PubMed Central journal article supplement (PMC7113522; doi:10.1002/jcsm.12527), 2020-01-28

**Figure S2** Western blot full images

### BNIP3 (30 KDa)

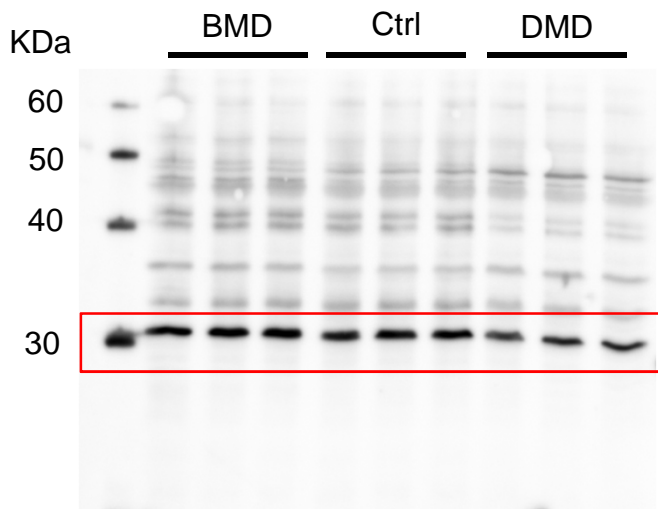

Total protein stain 12% gel

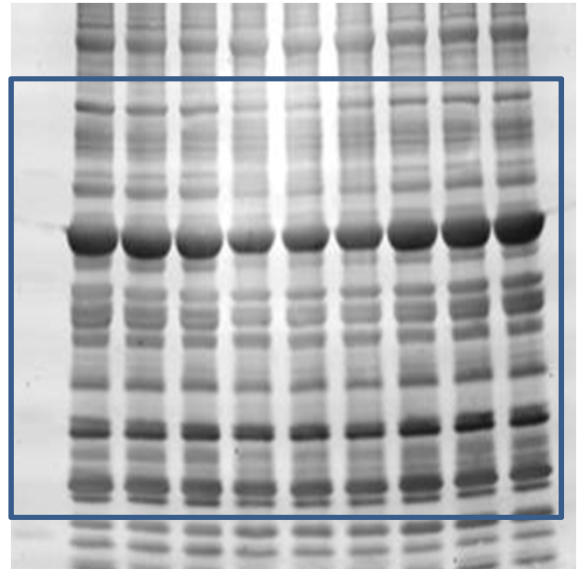

### LC3B (14 and 16 KDa)

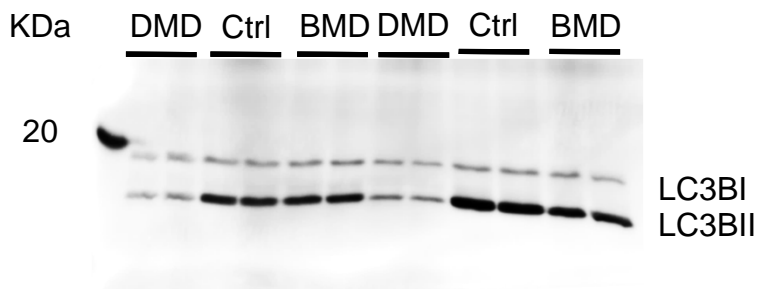

Total protein stain 14 gel %

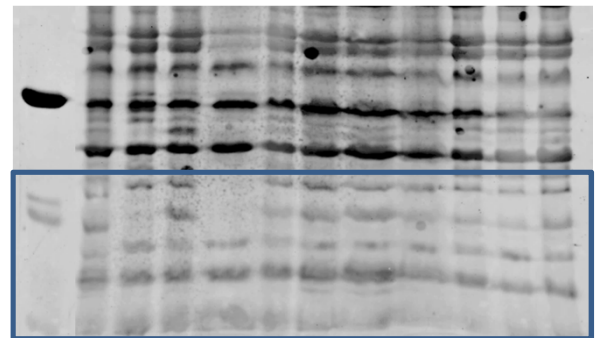

### PHD3 (27 KDa)

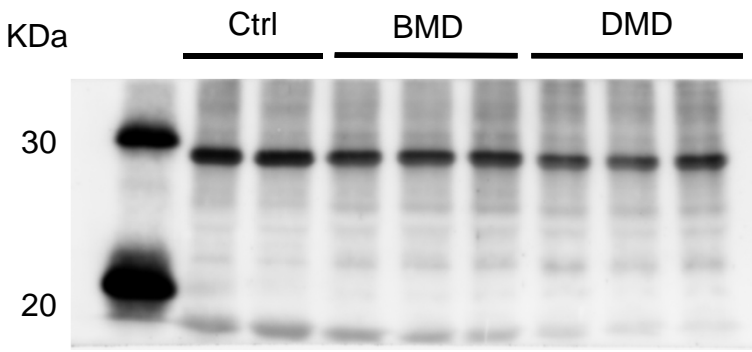

Total protein stain 10% gel

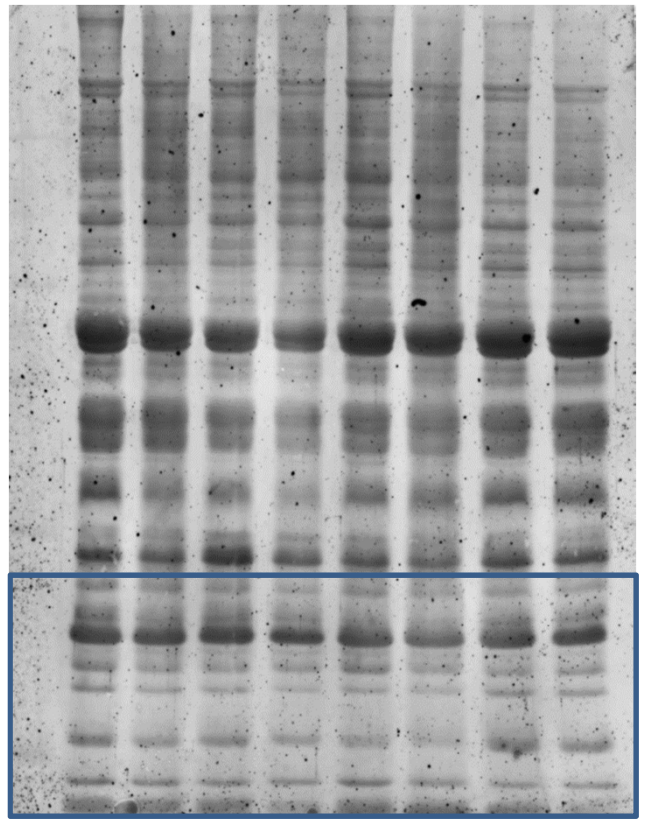

### nNOS (155 KDa)

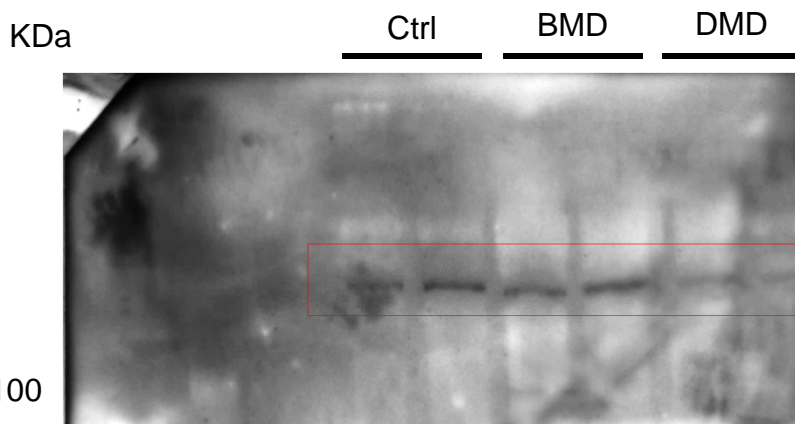

Total protein stain 10% gel

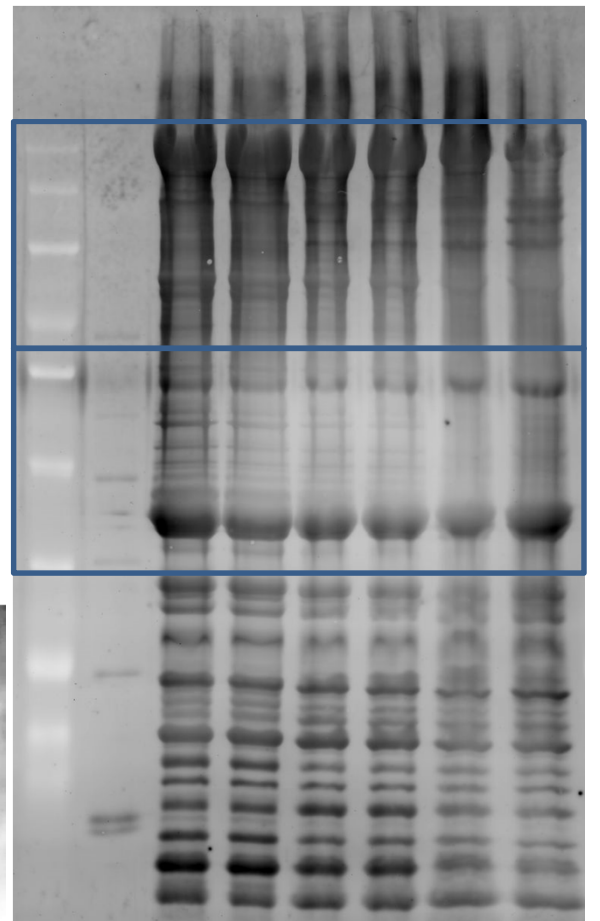

### de-Tyr alpha-tubulin (51 KDa)

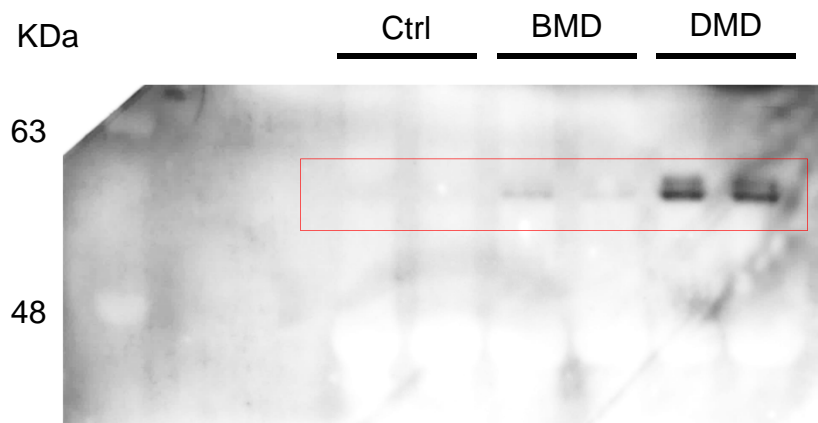

# FASN (270 KDa)

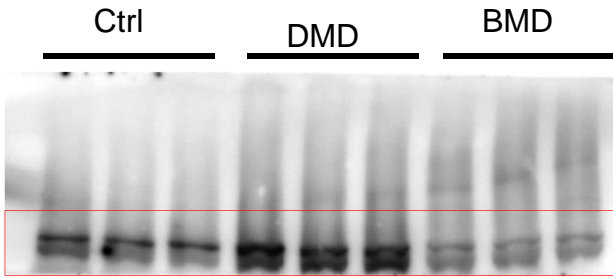

Total protein stain gel 6%

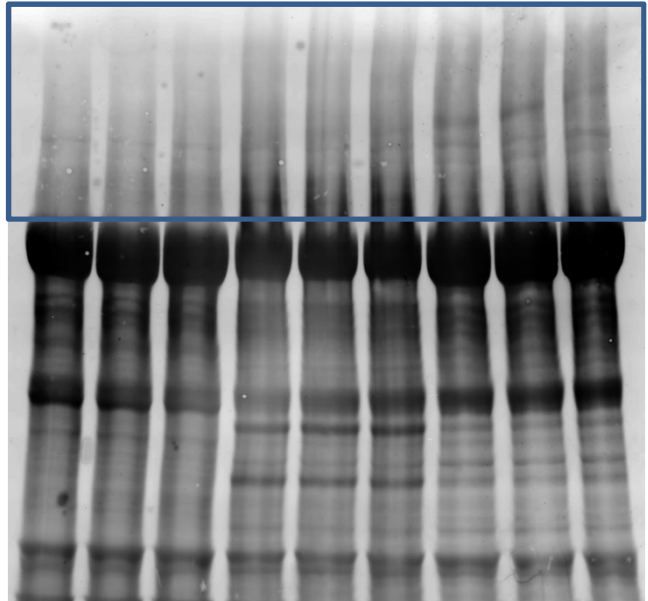

# PPAR $\alpha$ (55 KDa)

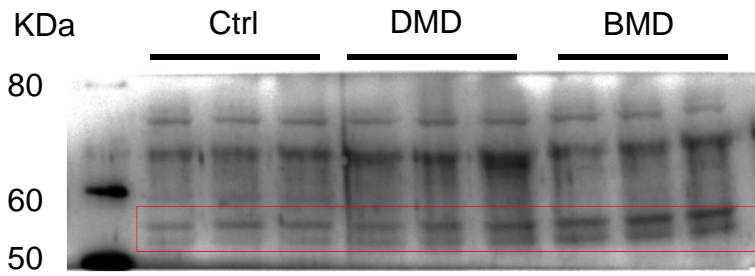

Total protein stain gel 8-14%

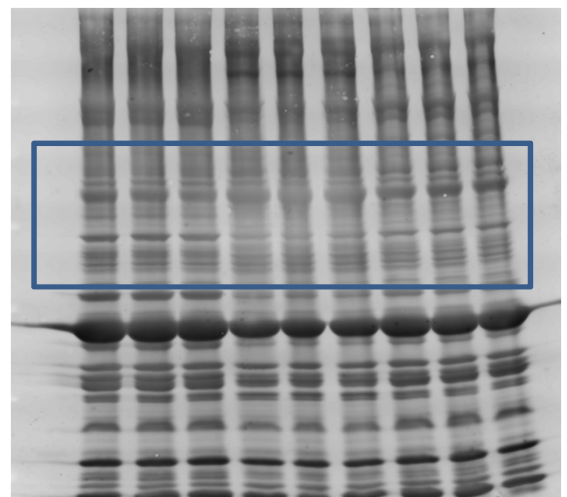

# CS (52 KDa)

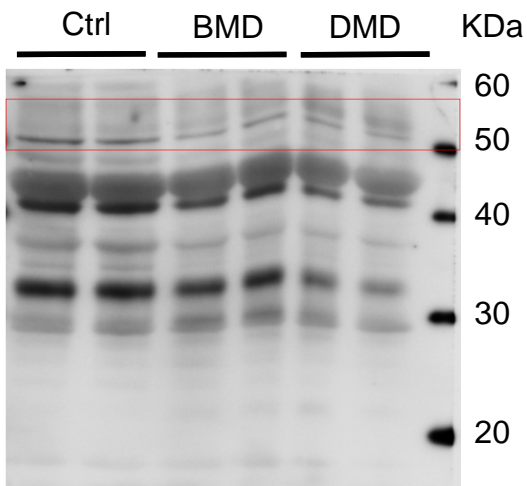

Total protein stain gel 12%

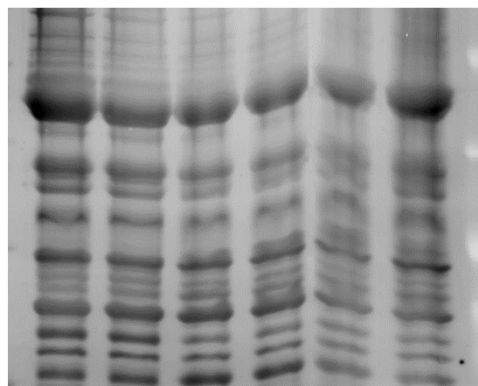

# STT3B (94 KDa)

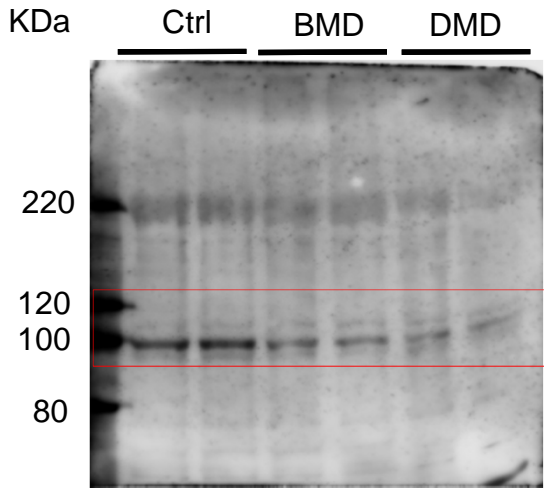

# Total protein stain gel 12%

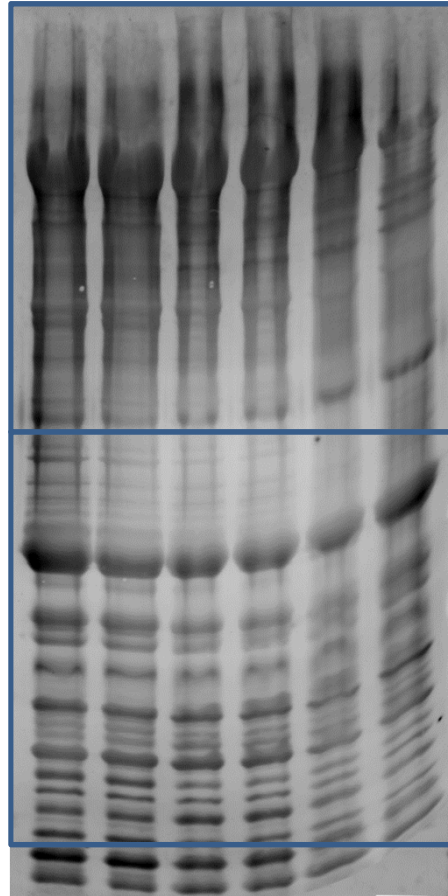

# GLUL (43 KDa)

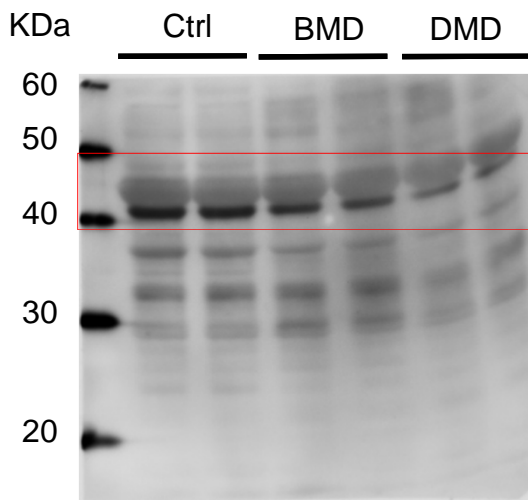

# FBP1 (36 KDa)

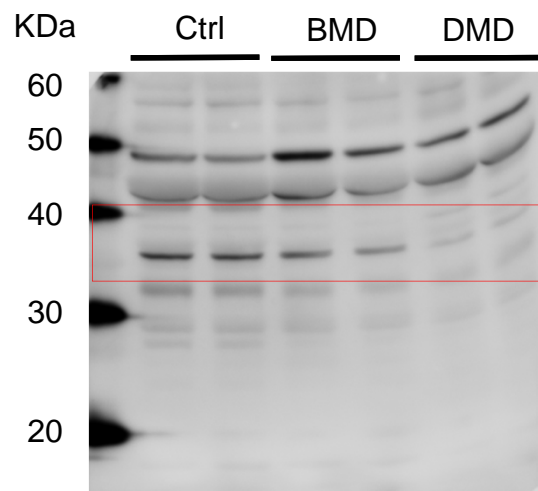

Supplement: JCSM-11-547-s002.pdf [file JCSM-11-547-s002.pdf]
