# Supplementary material for: Comparative proteomic analyses of Duchenne muscular dystrophy and Becker muscular dystrophy muscles: changes contributing to preserve muscle function in Becker muscular dystrophy patients
Source: PubMed Central journal article supplement (PMC7113522; doi:10.1002/jcsm.12527), 2020-01-28

## Figure S5. List of annotated spectra for MALDI-ToF identified proteins

### A representative MALDI-ToF PMF spectrum of MYL3

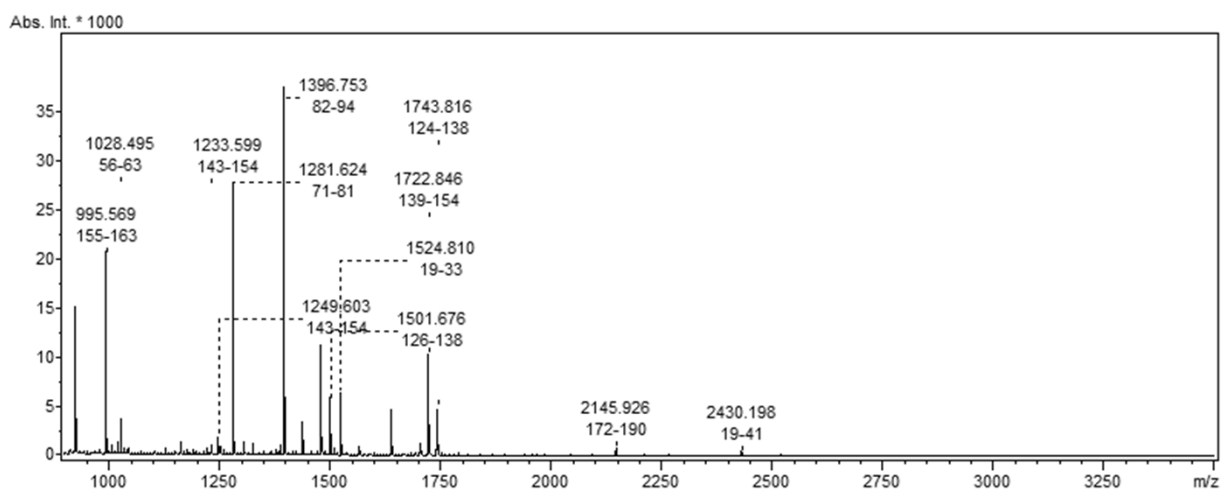

### A representative MALDI-ToF PMF spectrum of TNNT3

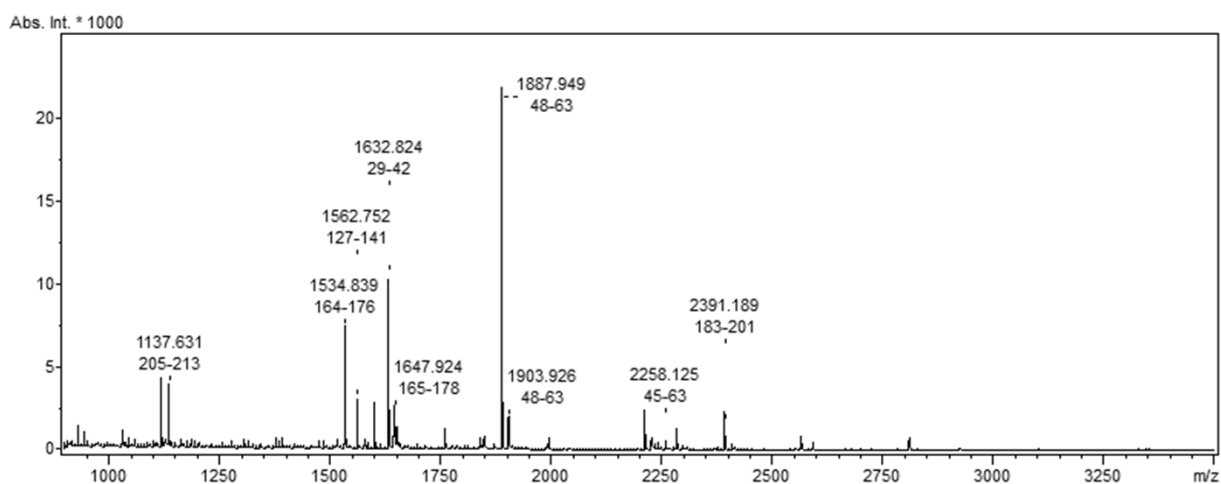

### A representative MALDI-ToF PMF spectrum of TNNI2

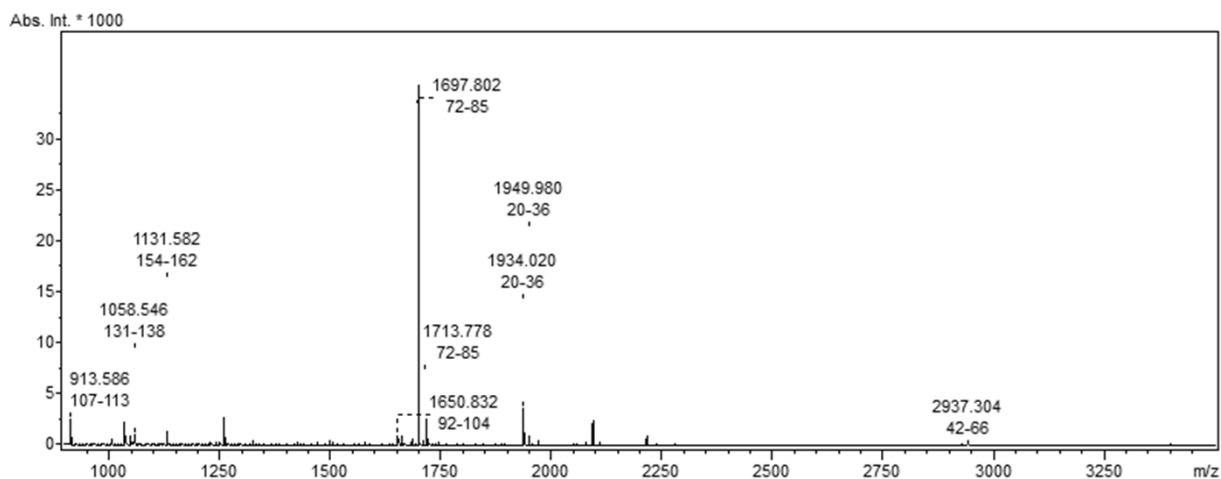

### A representative MALDI-ToF PMF spectrum of PYGM

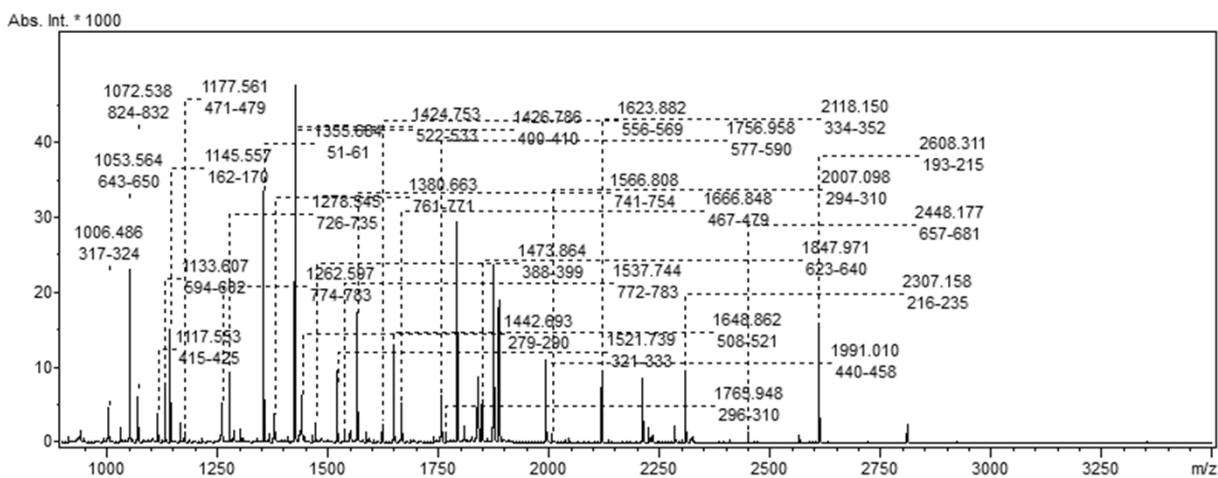

### A representative MALDI-ToF PMF spectrum of ALDOA, proteoform a

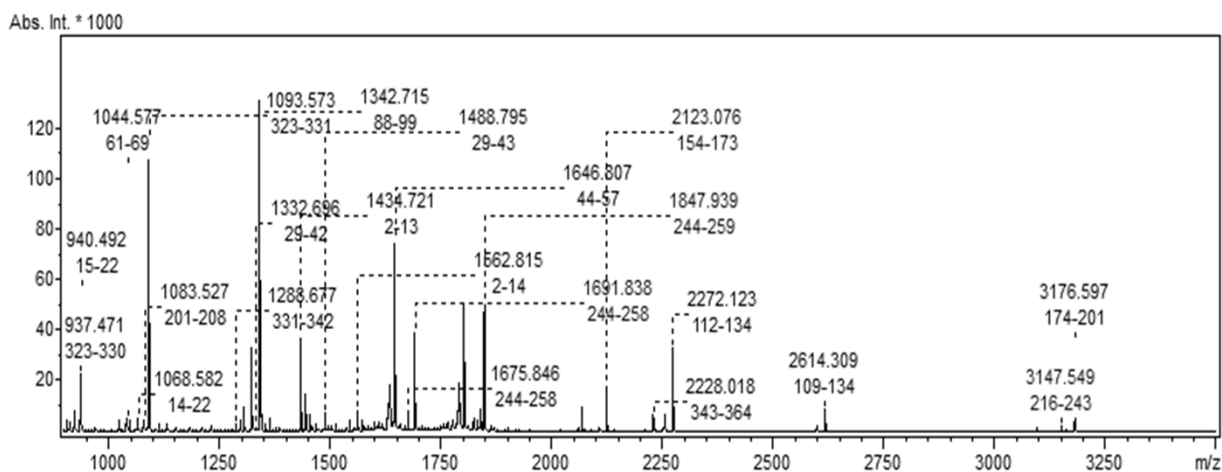

### A representative MALDI-ToF PMF spectrum of ALDOA, proteoform b

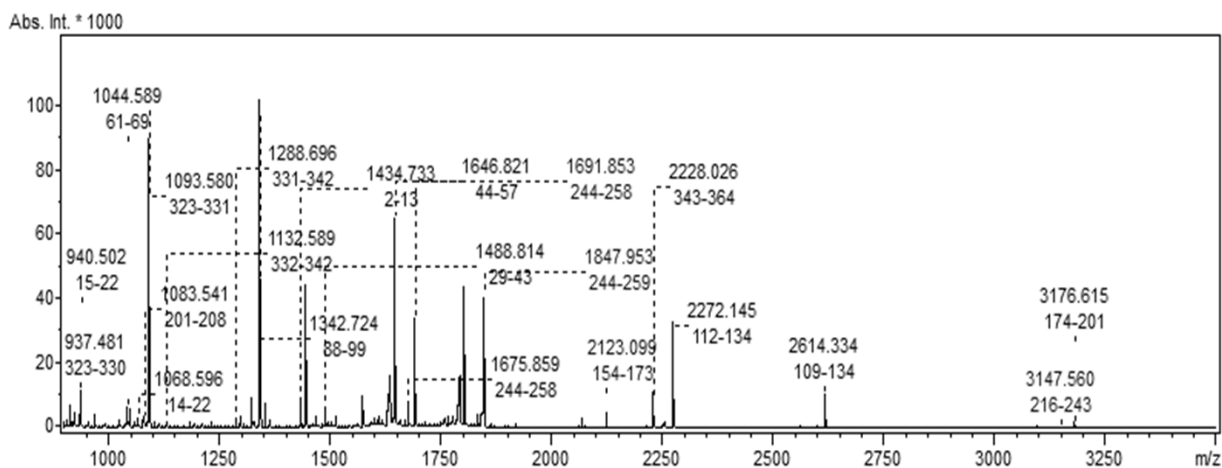

### A representative MALDI-ToF PMF spectrum of PGK1

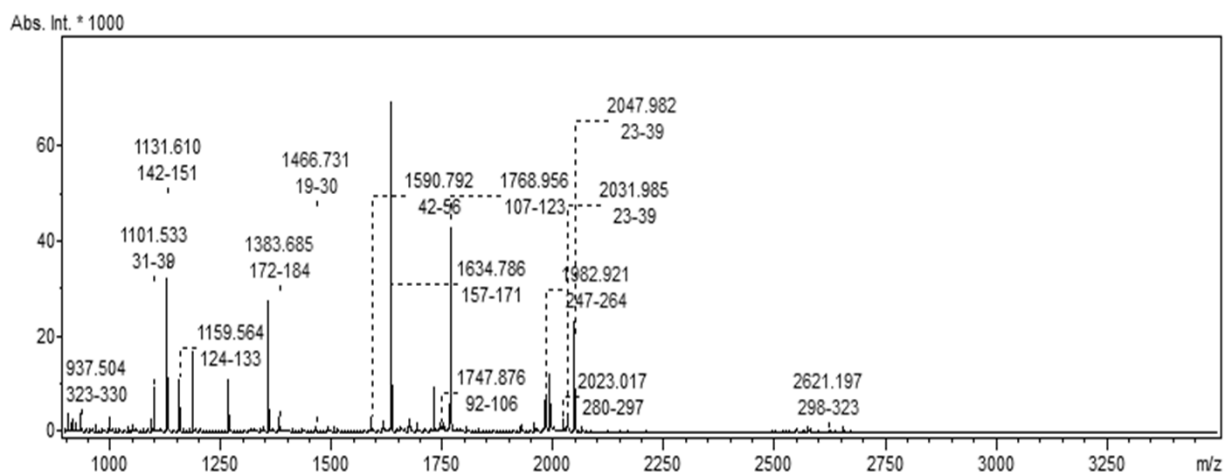

### A representative MALDI-ToF PMF spectrum of TPI1, proteoform a

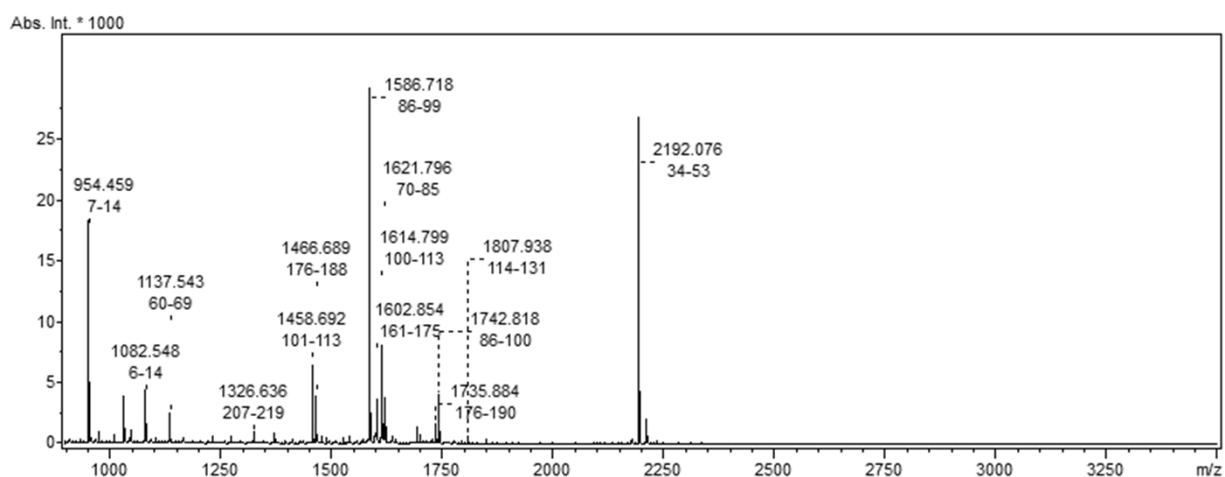

### A representative MALDI-ToF PMF spectrum of TPI1, proteoform b

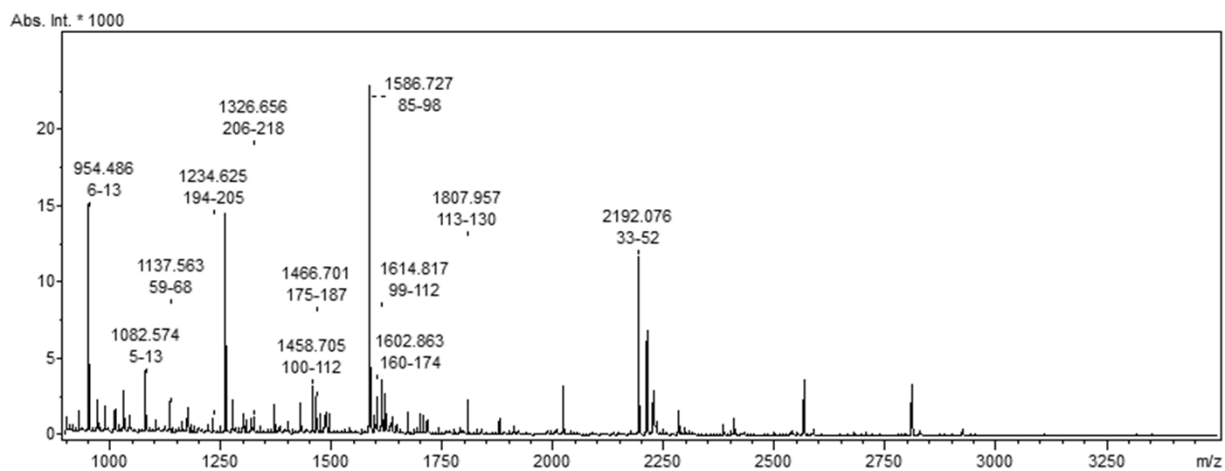

### A representative MALDI-ToF PMF spectrum of PGM1

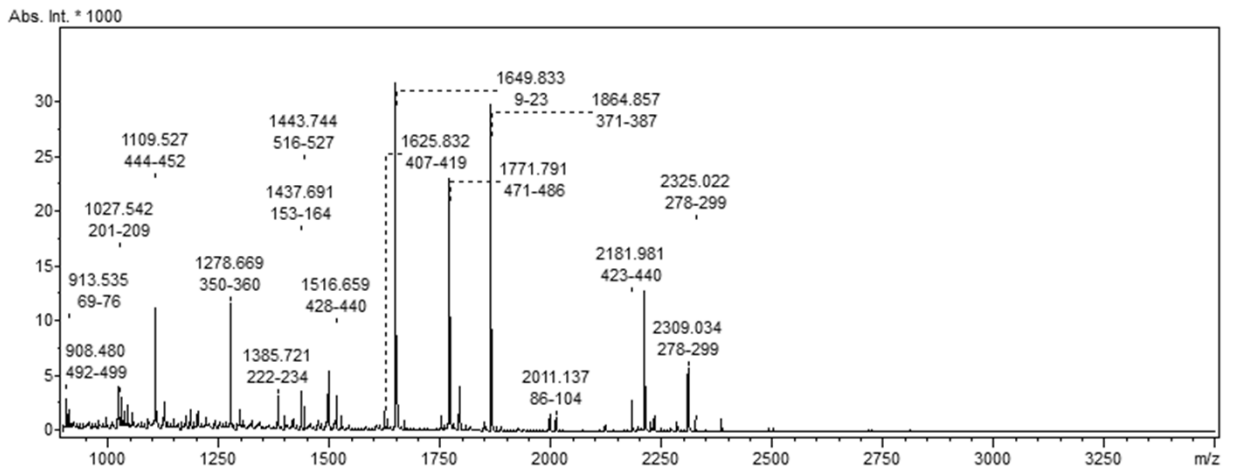

### A representative MALDI-ToF PMF spectrum of PGAM2

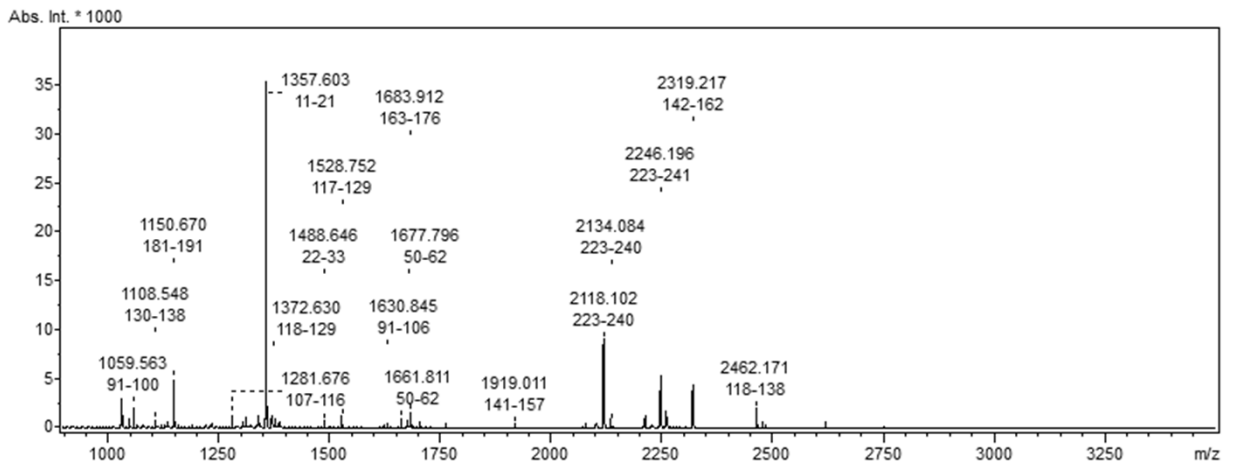

### A representative MALDI-ToF PMF spectrum of MDH1

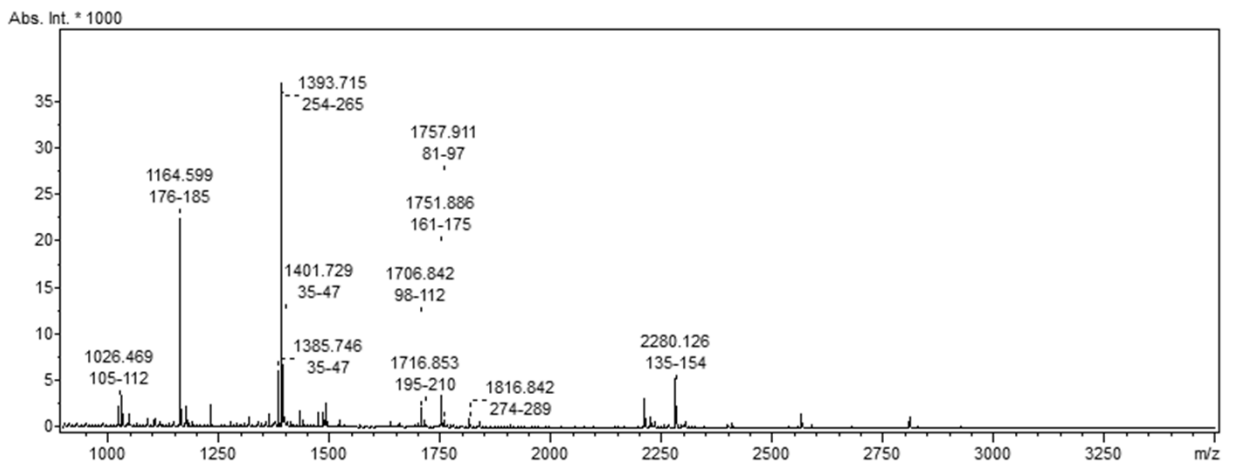

### A representative MALDI-ToF PMF spectrum of SDHA

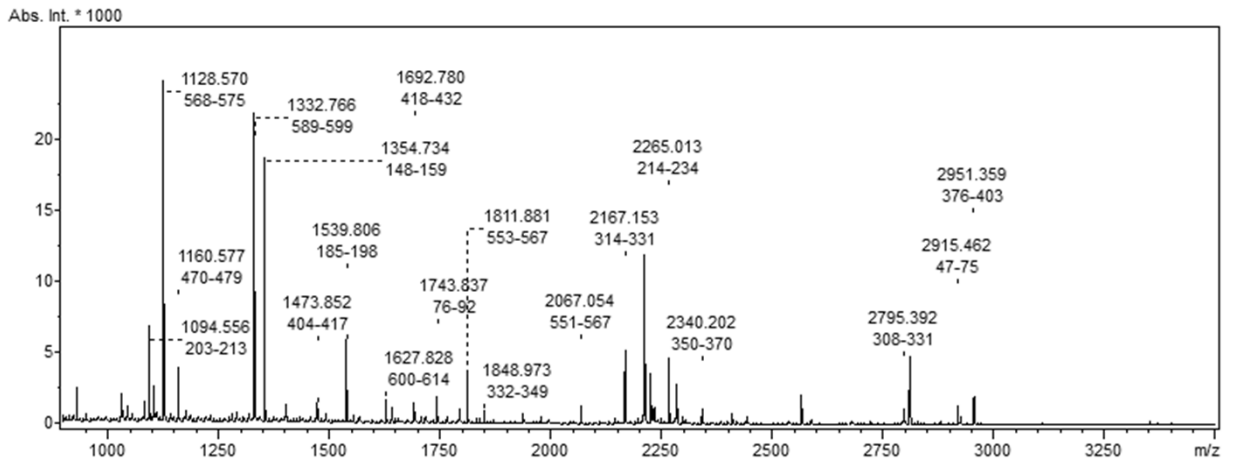

### A representative MALDI-ToF PMF spectrum of SUCLA2

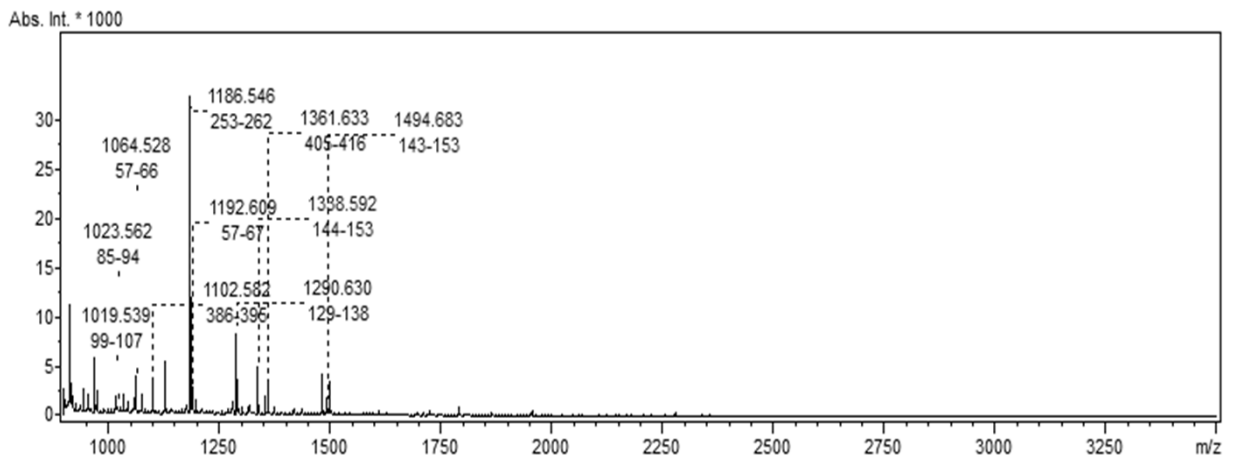

### A representative MALDI-ToF PMF spectrum of ATP5B

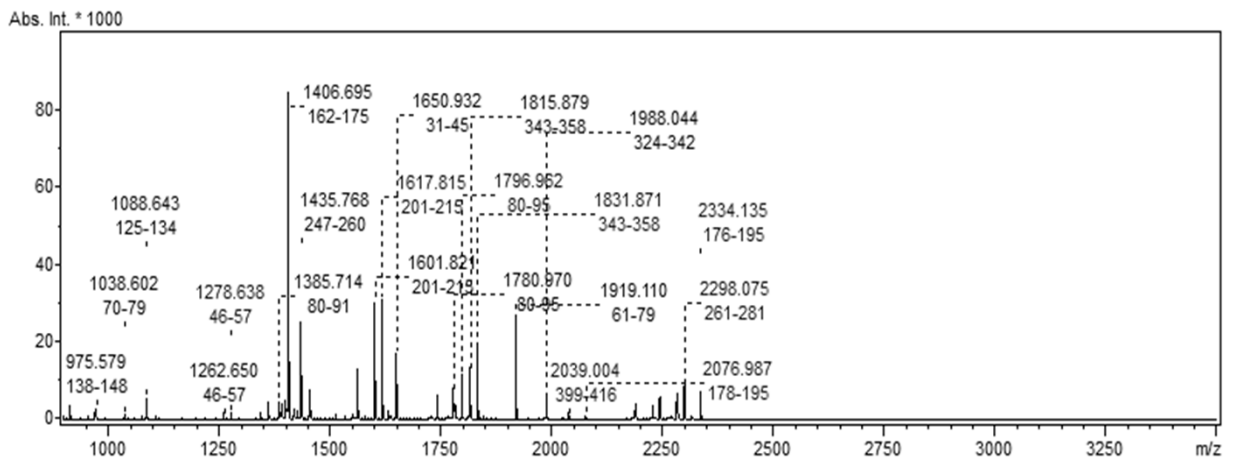

### A representative MALDI-ToF PMF spectrum of GOT1

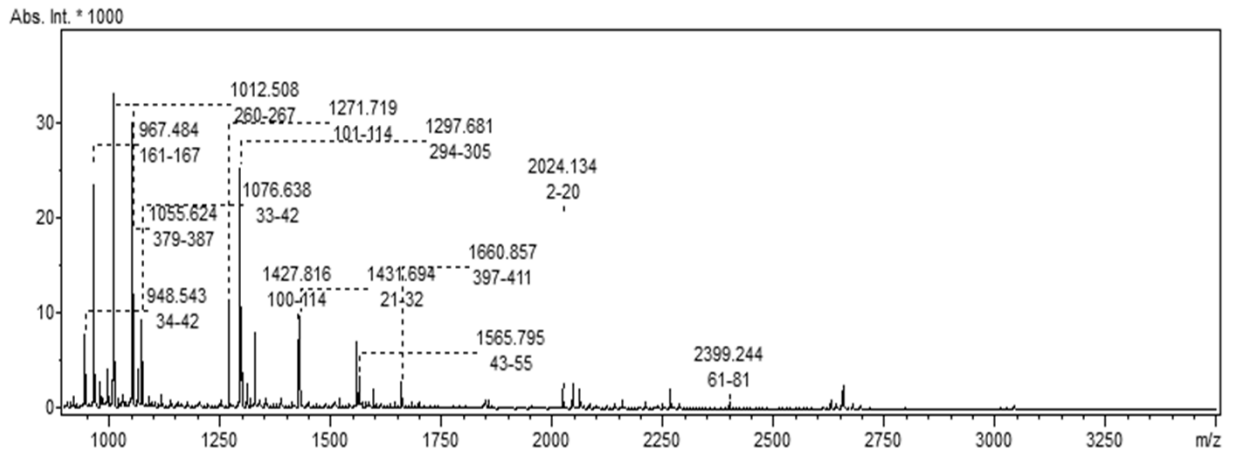

### A representative MALDI-ToF PMF spectrum of GOT2

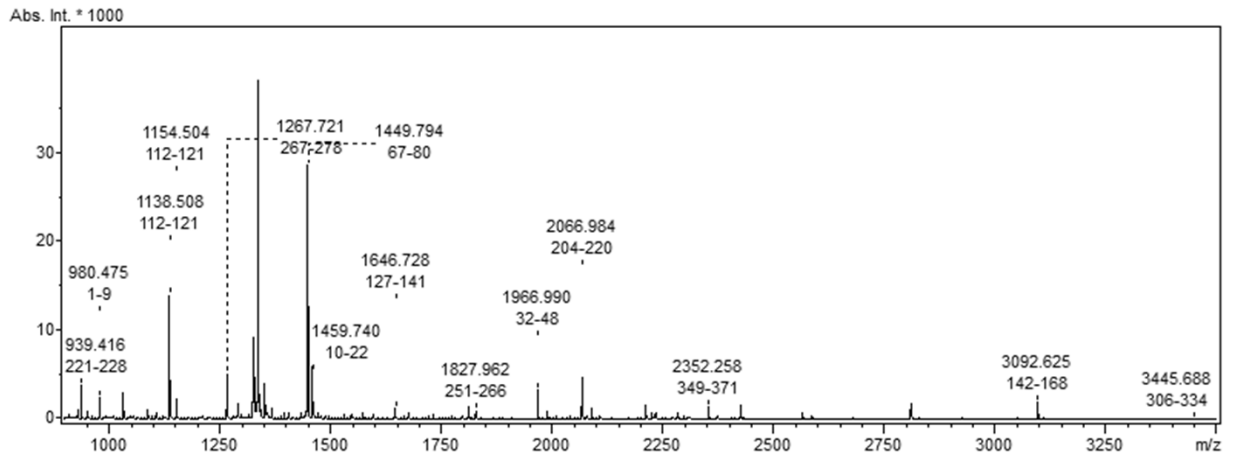

### A representative MALDI-ToF PMF spectrum of CA3

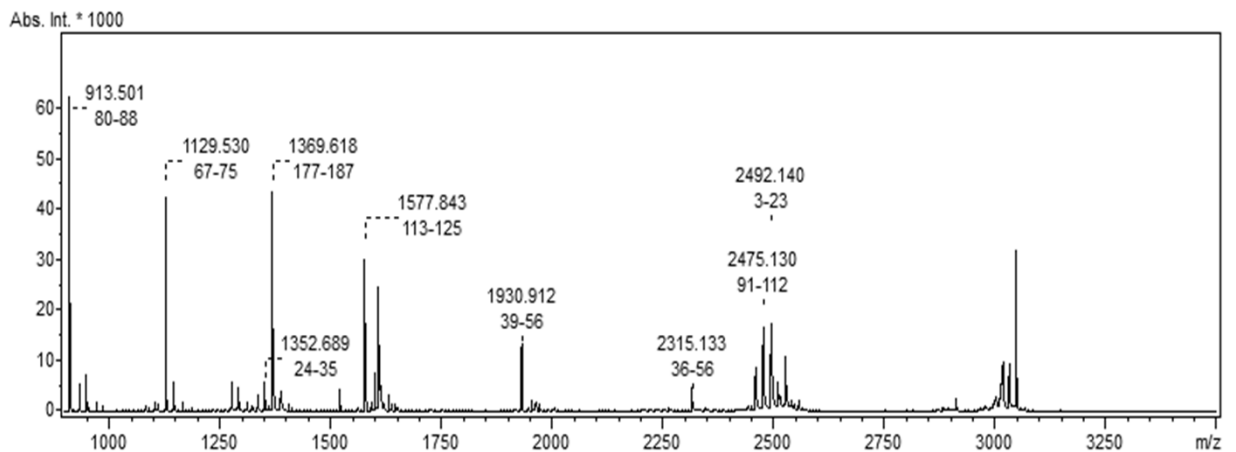

### A representative MALDI-ToF PMF spectrum of PRDX6

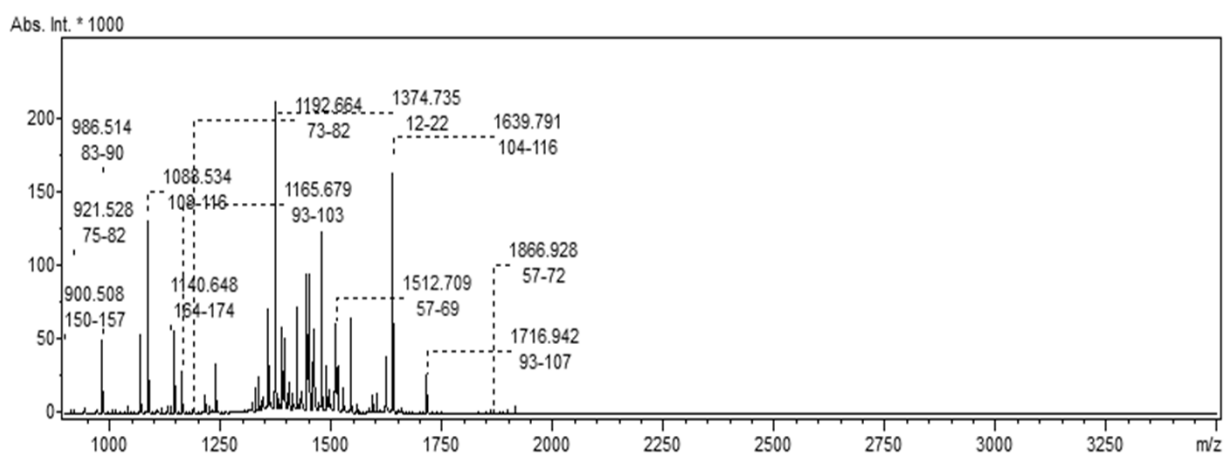

### A representative MALDI-ToF PMF spectrum of CRYAB

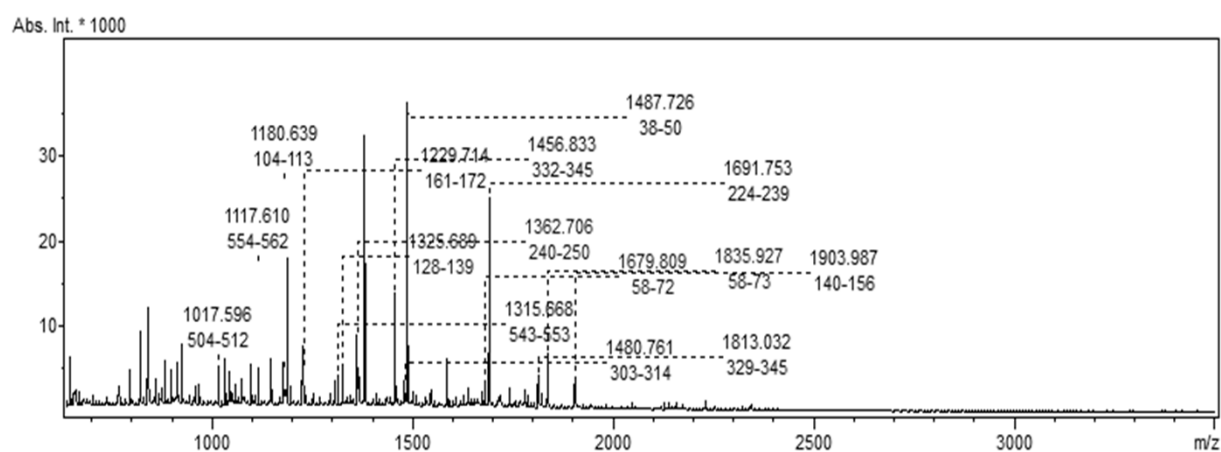

### A representative MALDI-ToF PMF spectrum of HSPA2

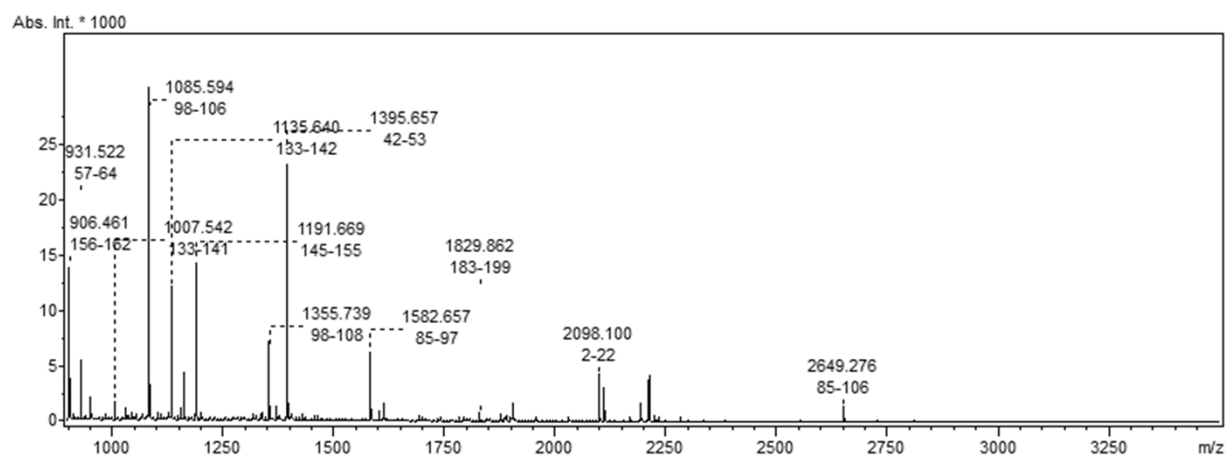

A representative MALDI-ToF PMF spectrum of SOD2, proteoform a

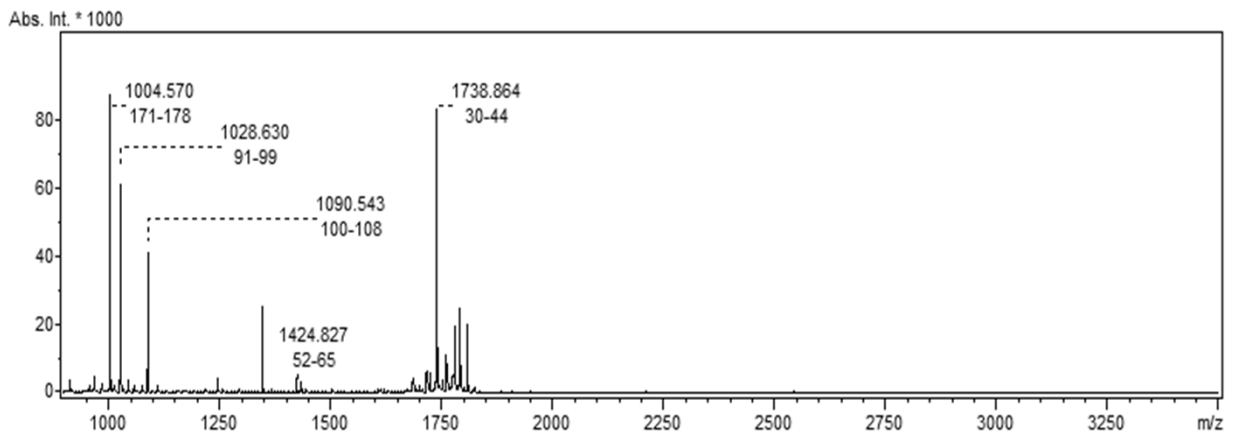

A representative MALDI-ToF PMF spectrum of SOD2, proteoform b

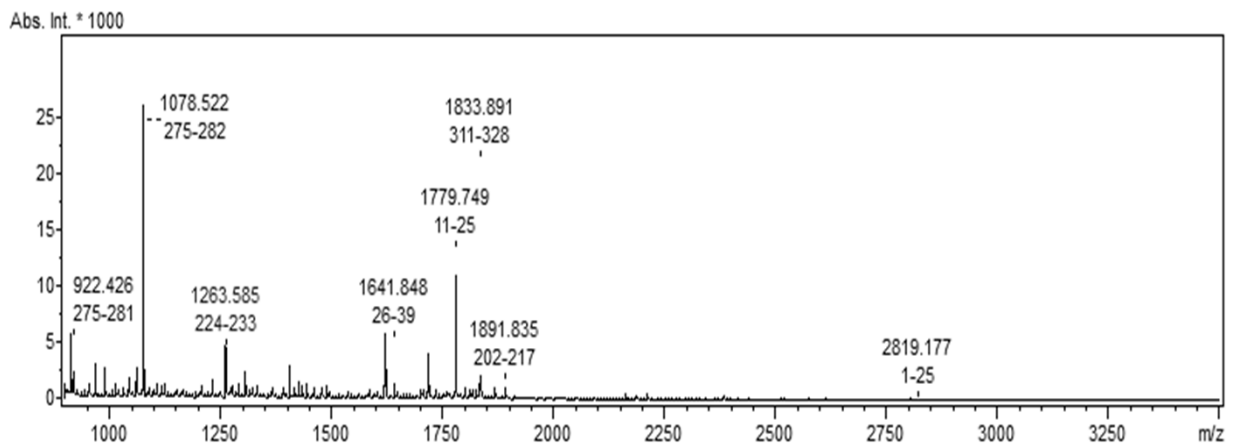

A representative MALDI-ToF PMF spectrum of SERPINA1

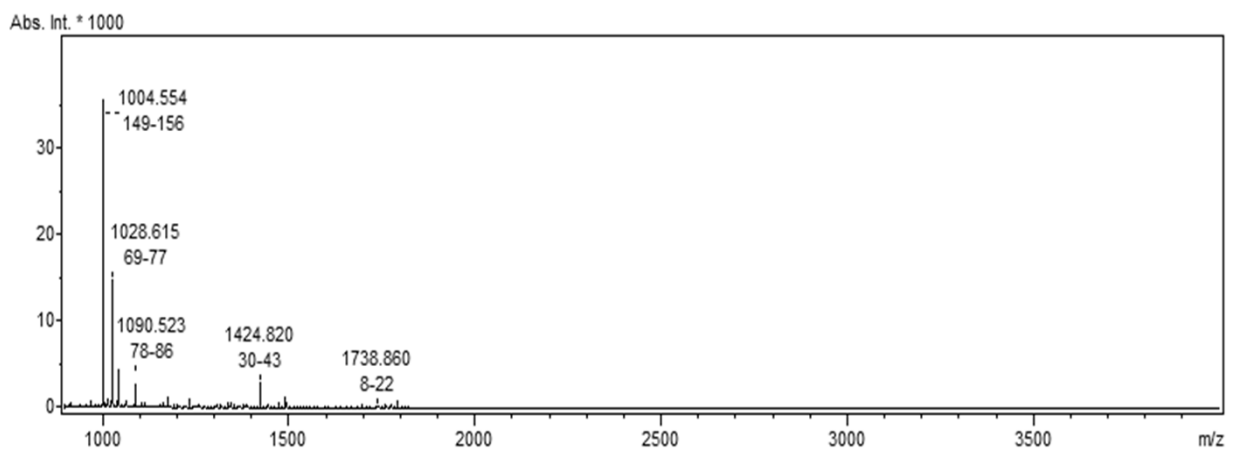





A representative MALDI-ToF PMF spectrum of TF, proteoform b

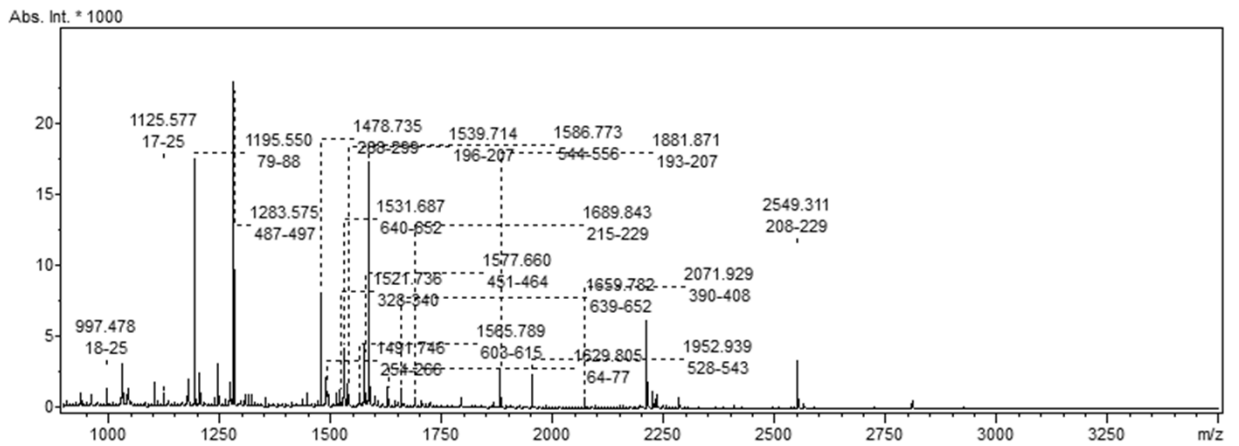

A representative MALDI-ToF PMF spectrum of TF, proteoform c

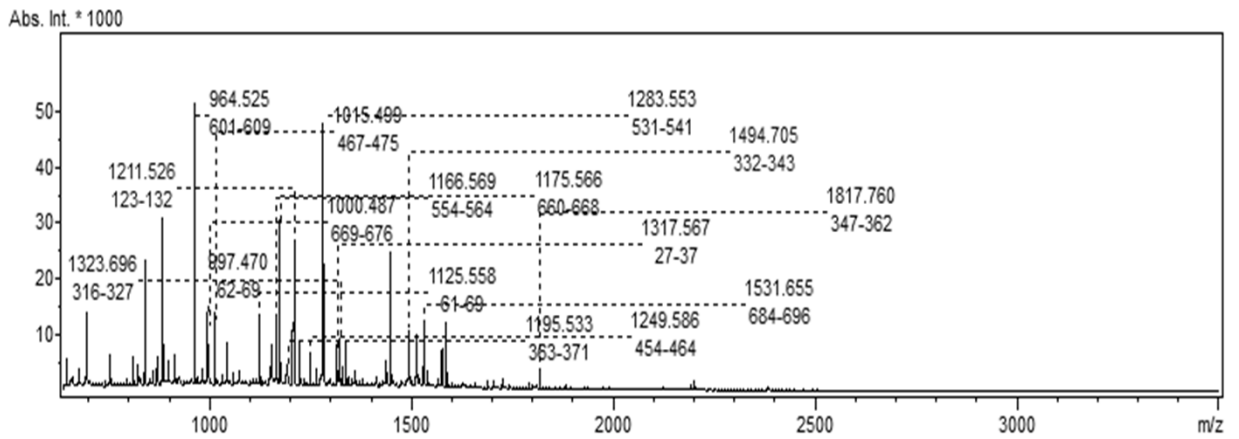

A representative MALDI-ToF PMF spectrum of GSN

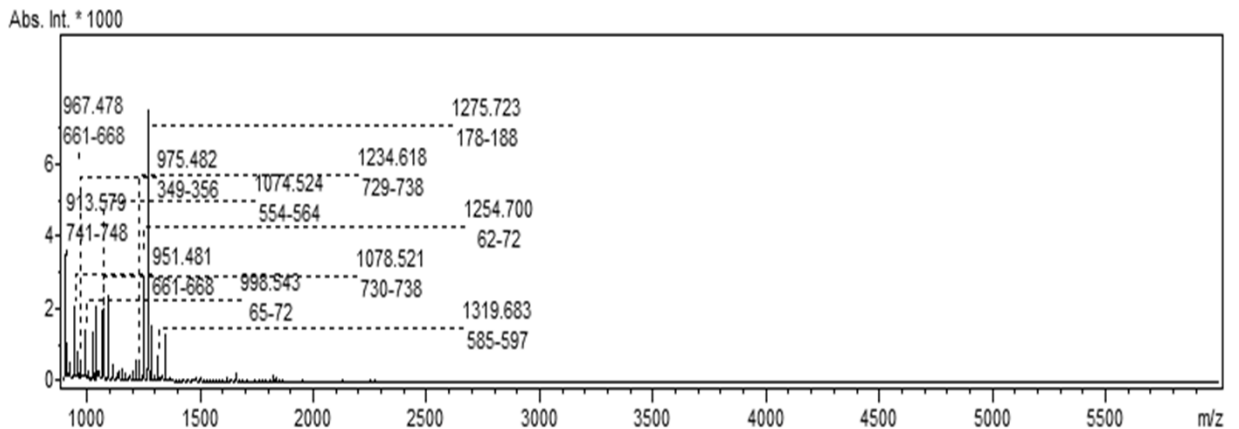

A representative MALDI-ToF PMF spectrum of DES, proteoform a

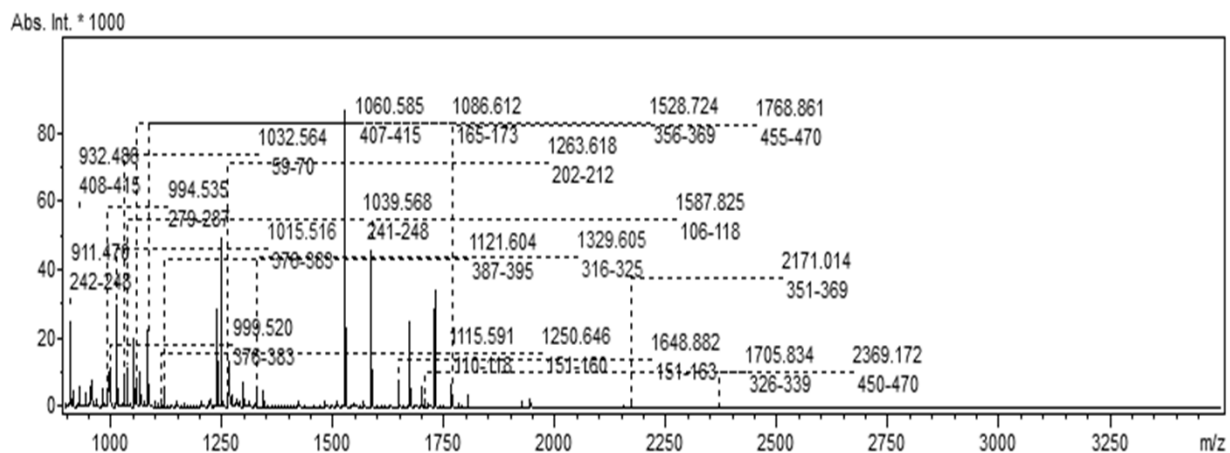

A representative MALDI-ToF PMF spectrum of DES, proteoform b

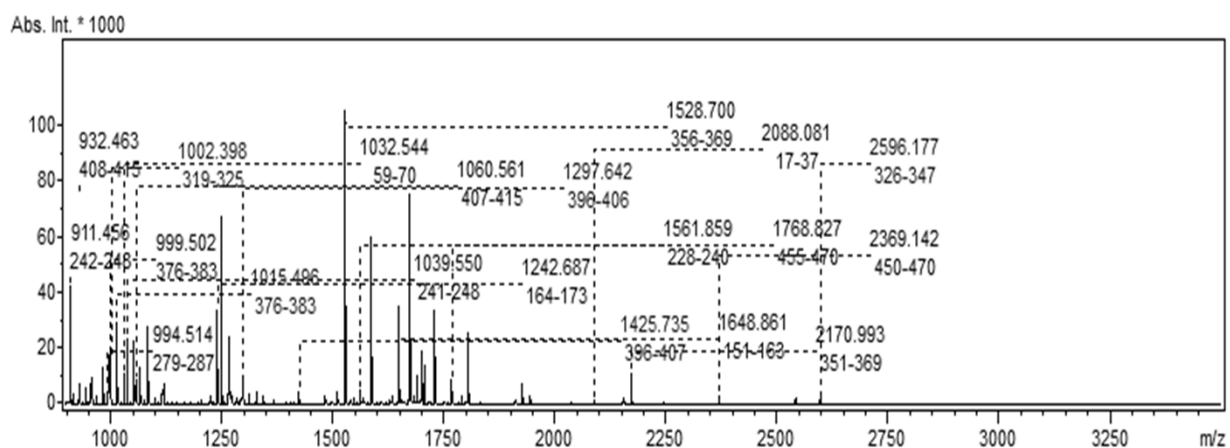

A representative MALDI-ToF PMF spectrum of MYH2

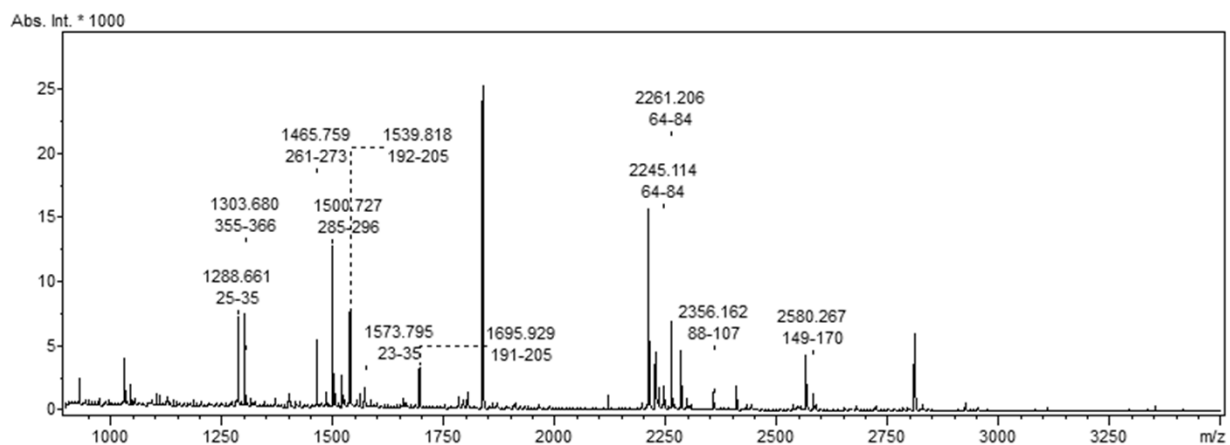

A representative MALDI-ToF PMF spectrum of ACTA1, proteoform a

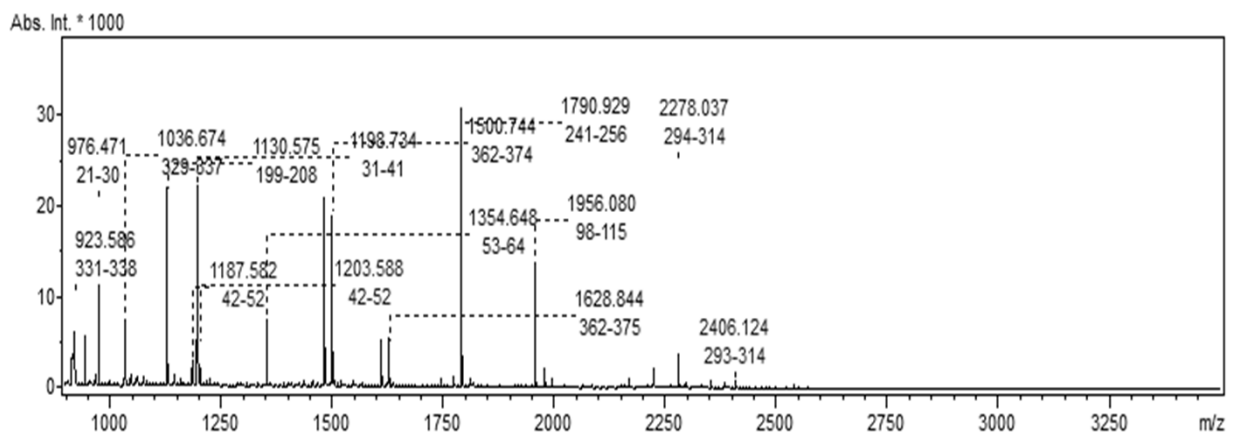

A representative MALDI-ToF PMF spectrum of ACTA1, proteoform b

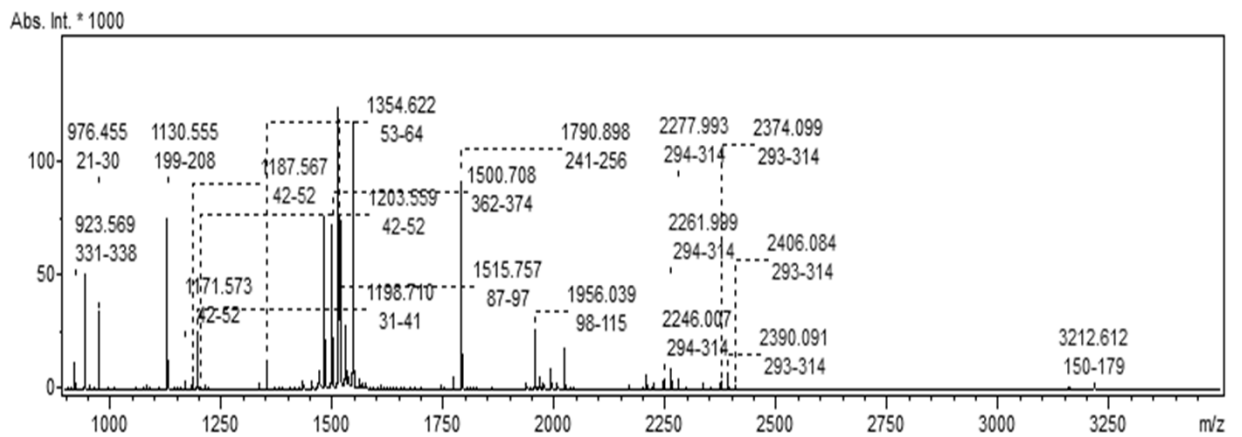

A representative MALDI-ToF PMF spectrum of ACTA1, proteoform c

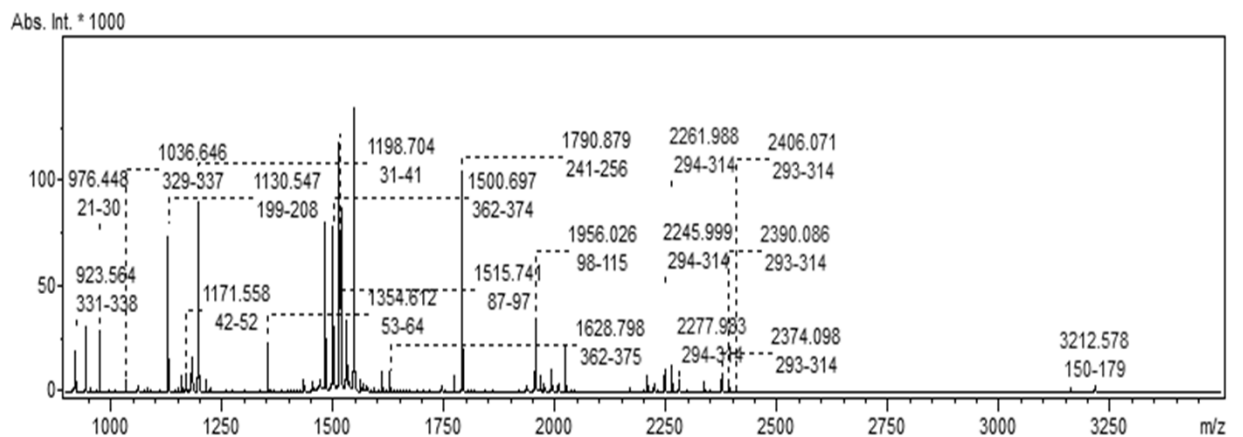

### A representative MALDI-ToF PMF spectrum of ACTA1, proteoform d

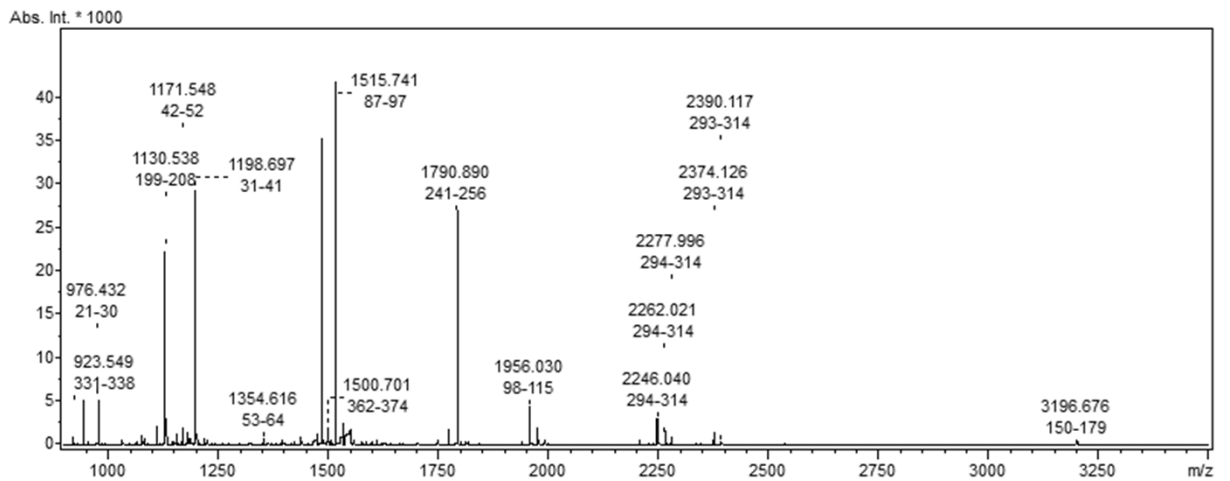

### A representative MALDI-ToF PMF spectrum of ACTA1, proteoform e

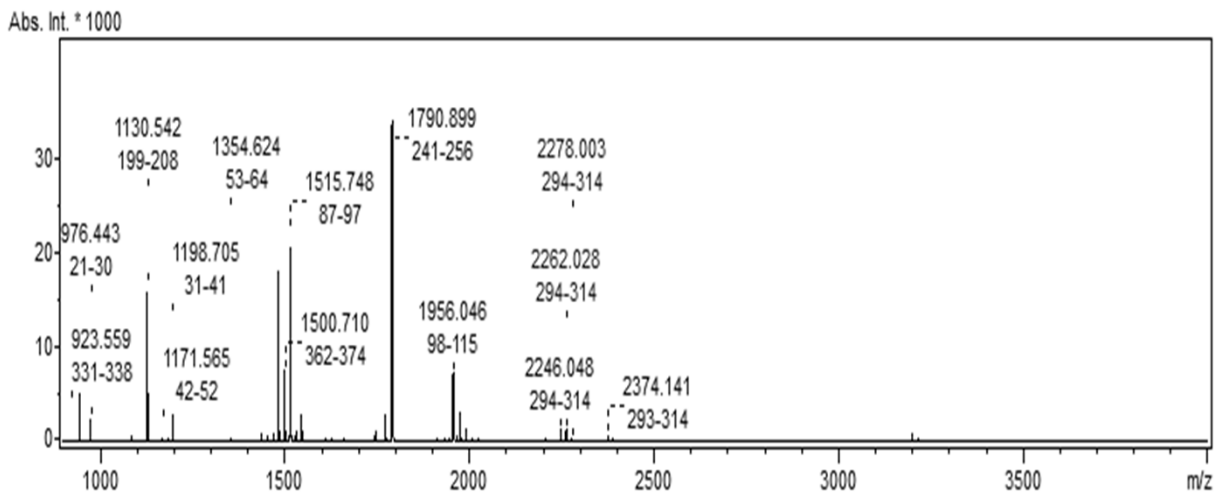

### A representative MALDI-ToF PMF spectrum of FHL1

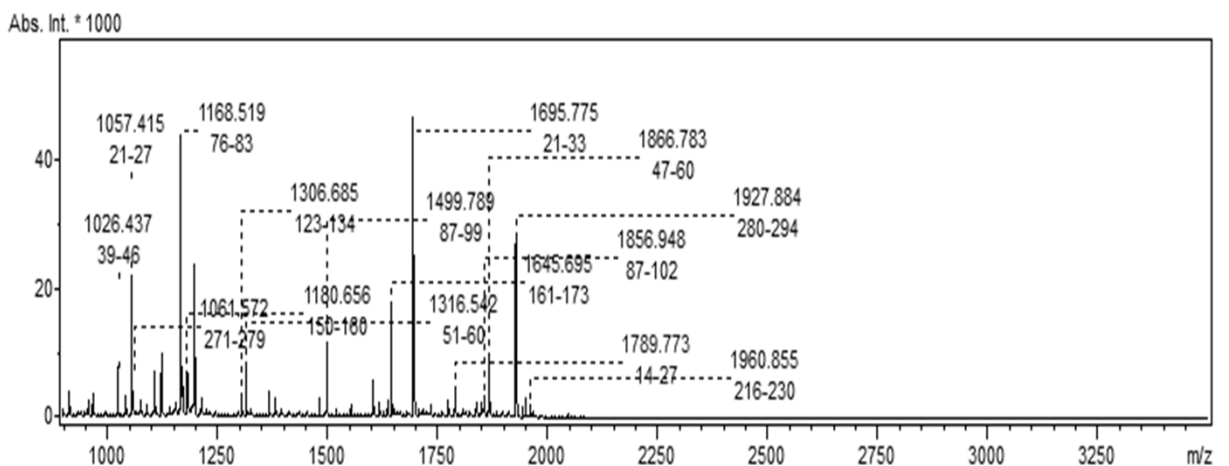

### A representative MALDI-ToF PMF spectrum of LDB3

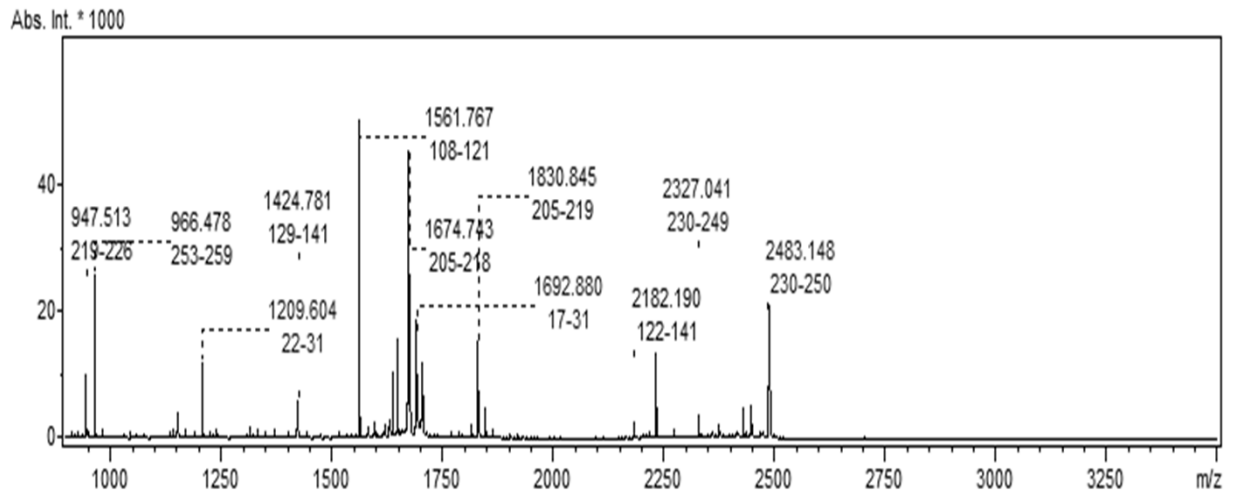

### A representative MALDI-ToF PMF spectrum of MYLPF

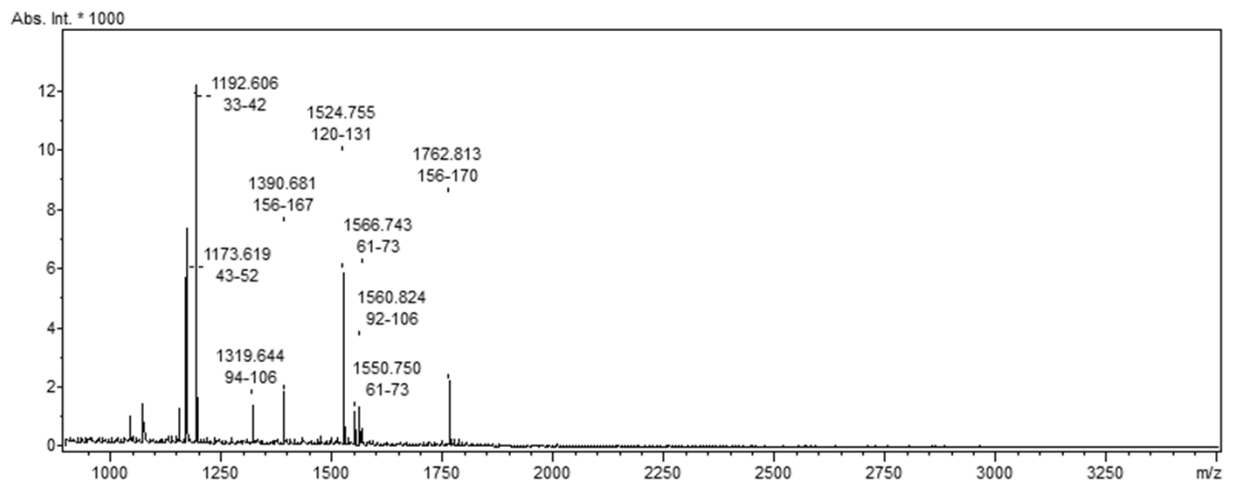

### A representative MALDI-ToF PMF spectrum of ENO3

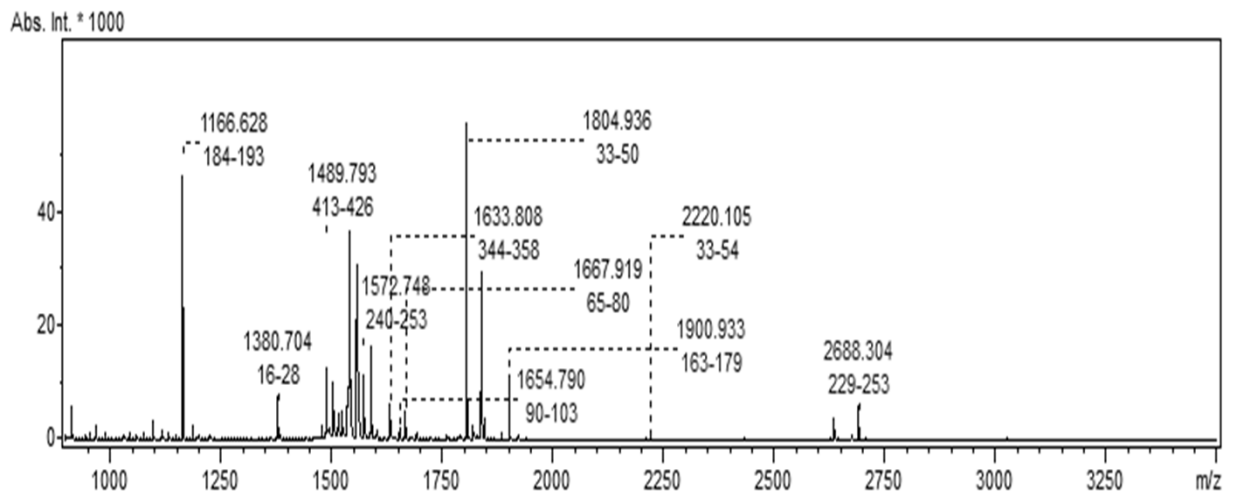

### A representative MALDI-ToF PMF spectrum of PKM2

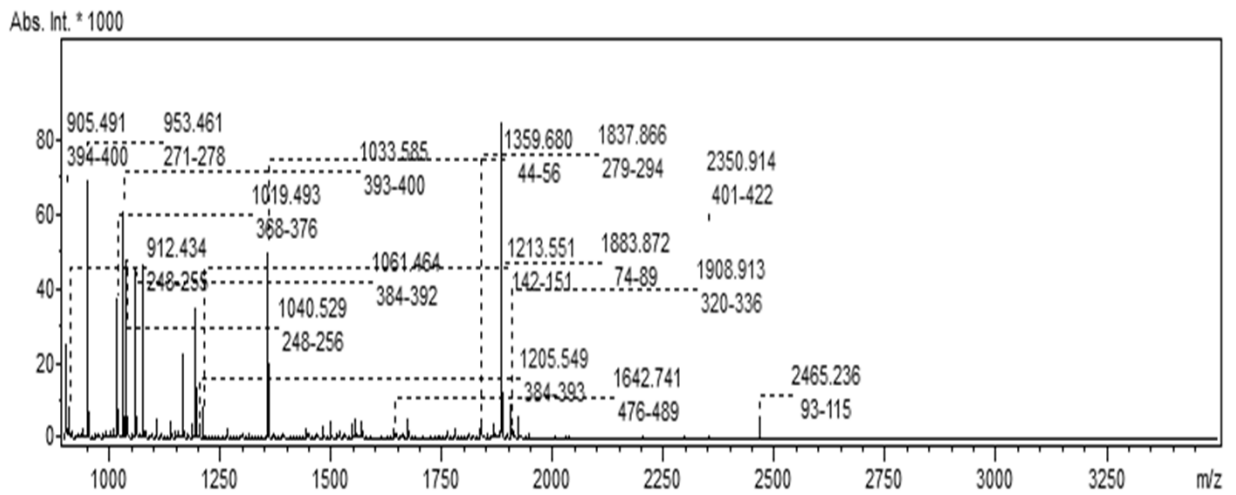

### A representative MALDI-ToF PMF spectrum of GAPDH

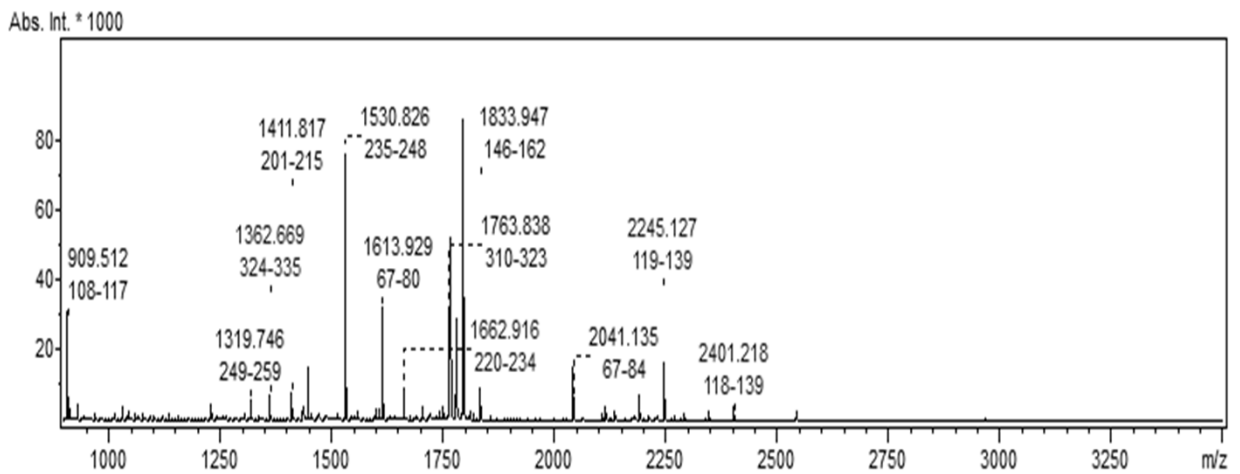

### A representative MALDI-ToF PMF spectrum of IDH2

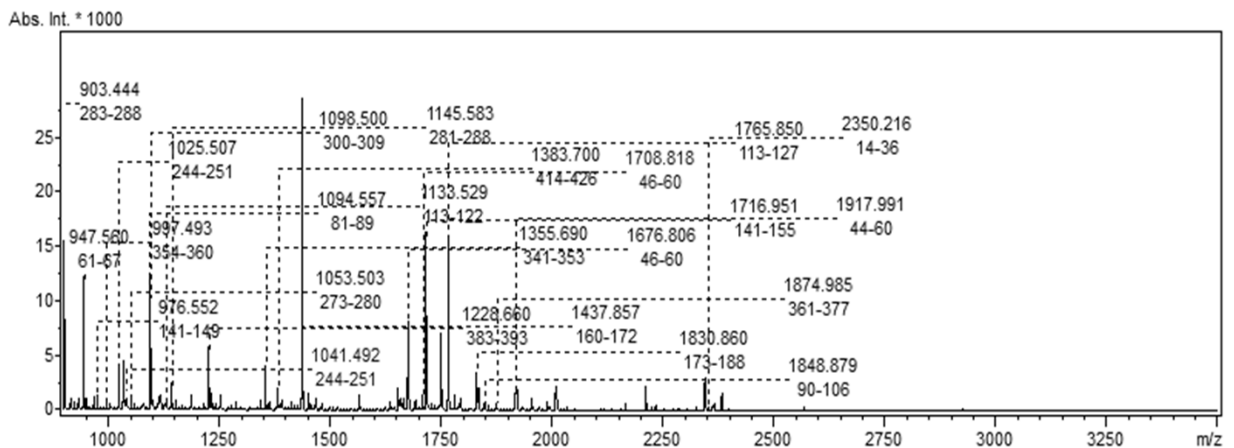

A representative MALDI-ToF PMF spectrum of CKMT2

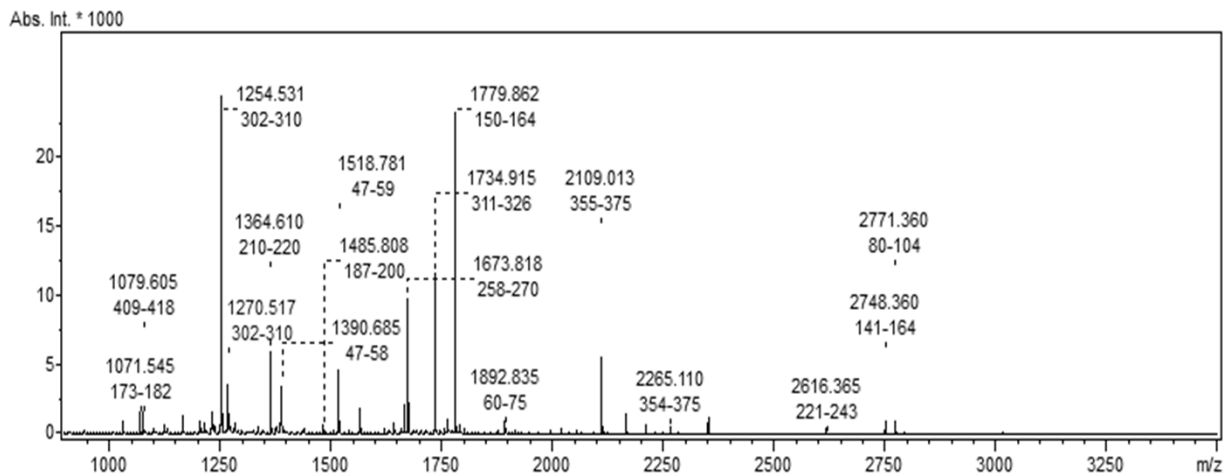

A representative MALDI-ToF PMF spectrum of UQCRC1

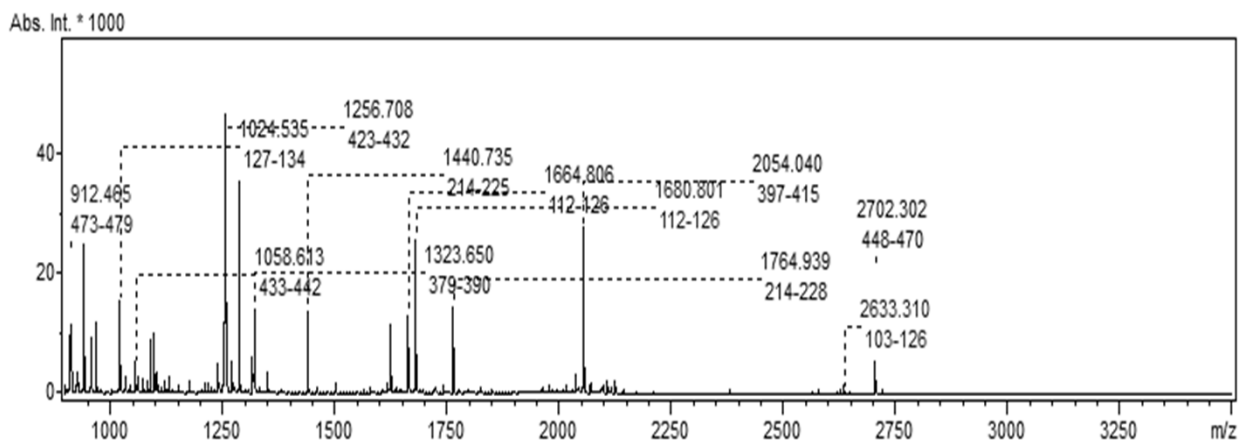

A representative MALDI-ToF PMF spectrum of TUFM

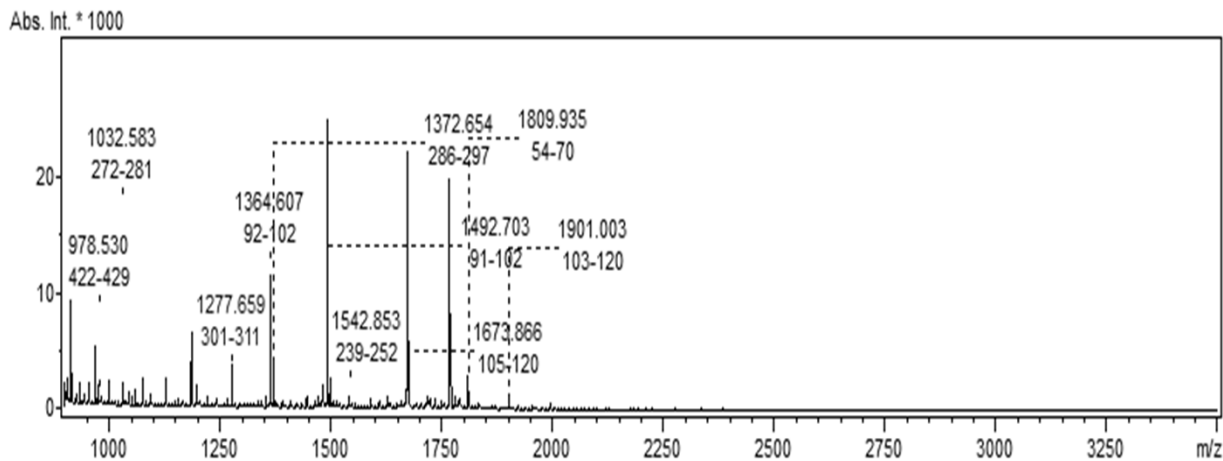



### A representative MALDI-ToF PMF spectrum of EIF2S1

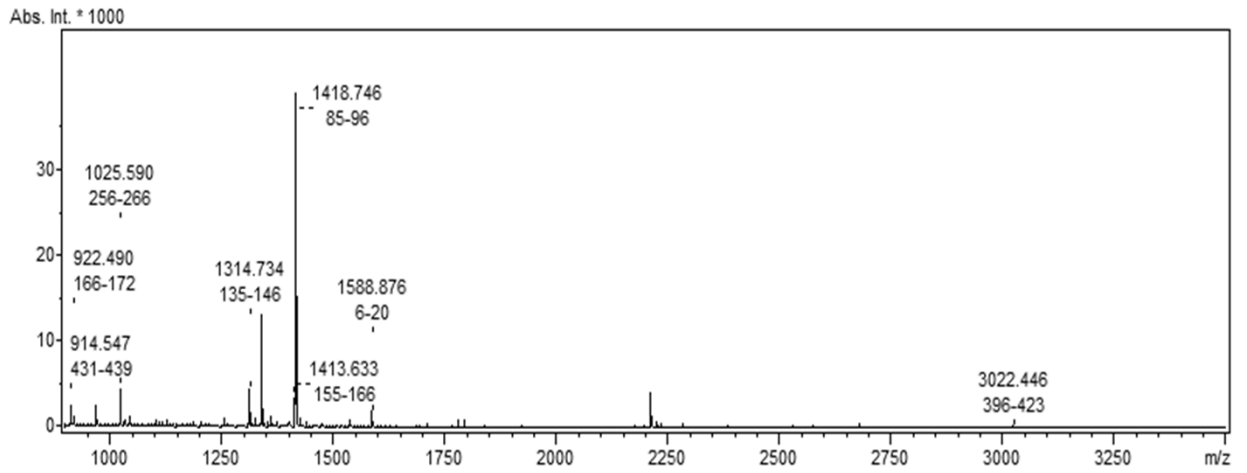

### A representative MALDI-ToF PMF spectrum of HSP90AB1

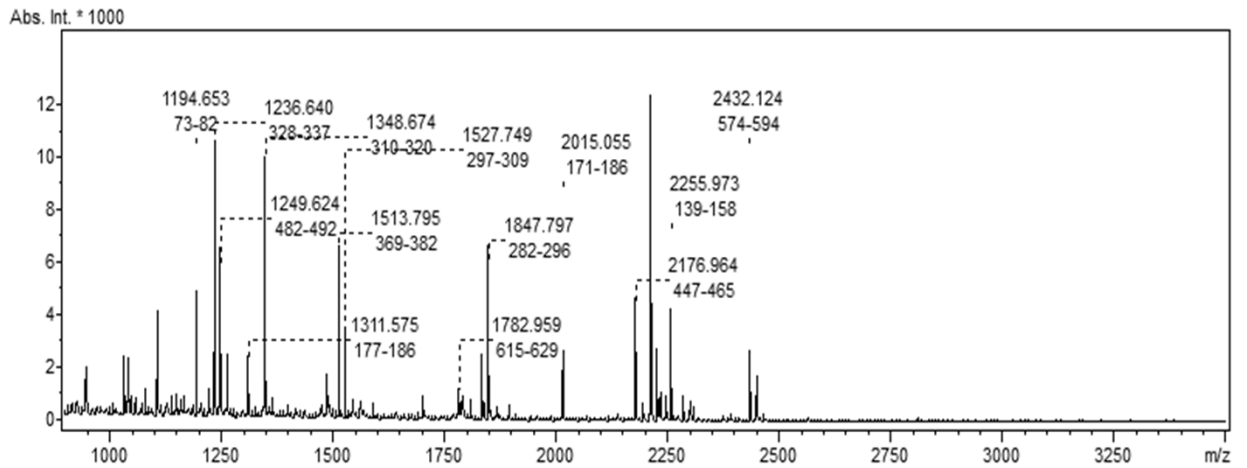

### A representative MALDI-ToF PMF spectrum of PARK7

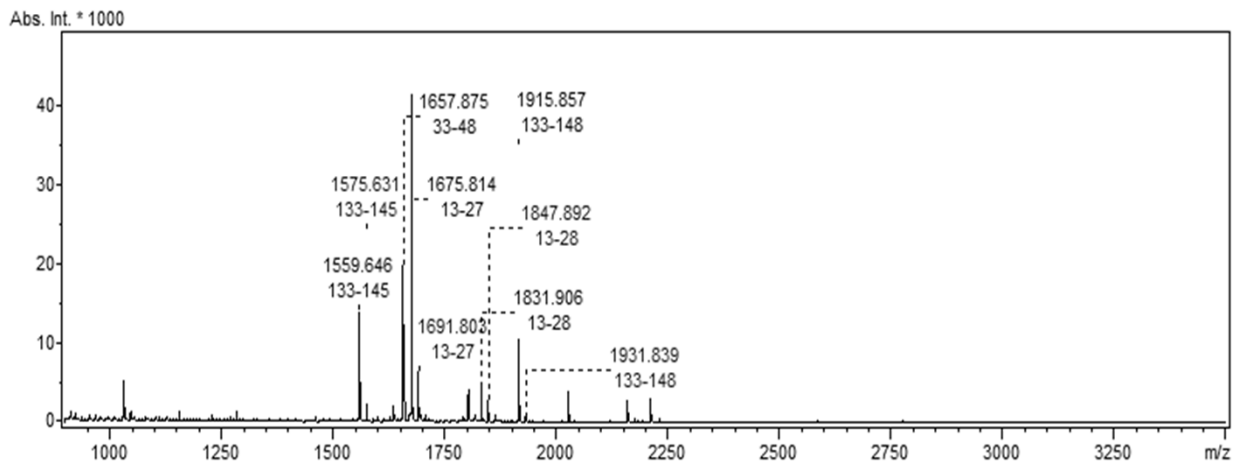

### A representative MALDI-ToF PMF spectrum of TRIM72

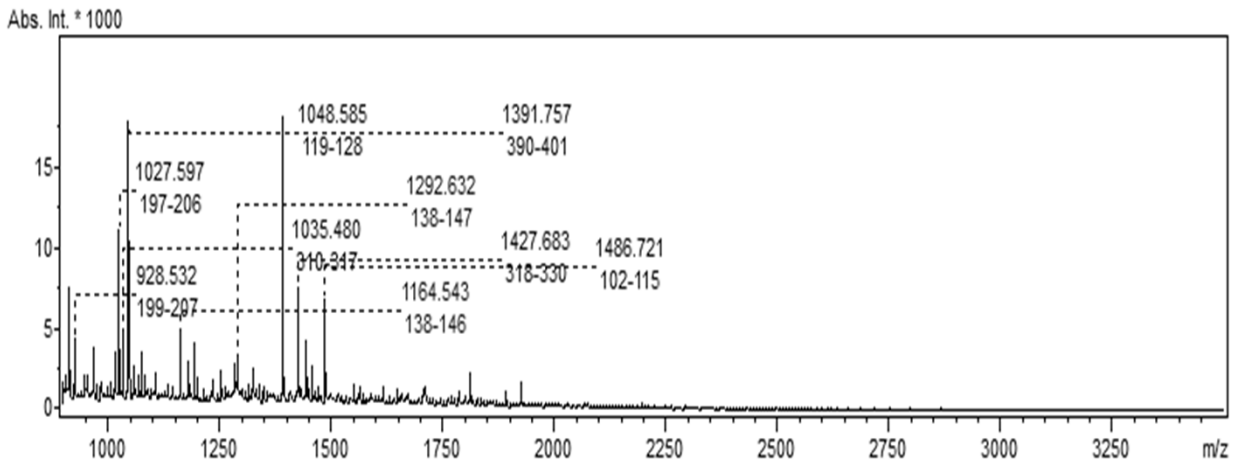

### A representative MALDI-ToF PMF spectrum of HSPA5

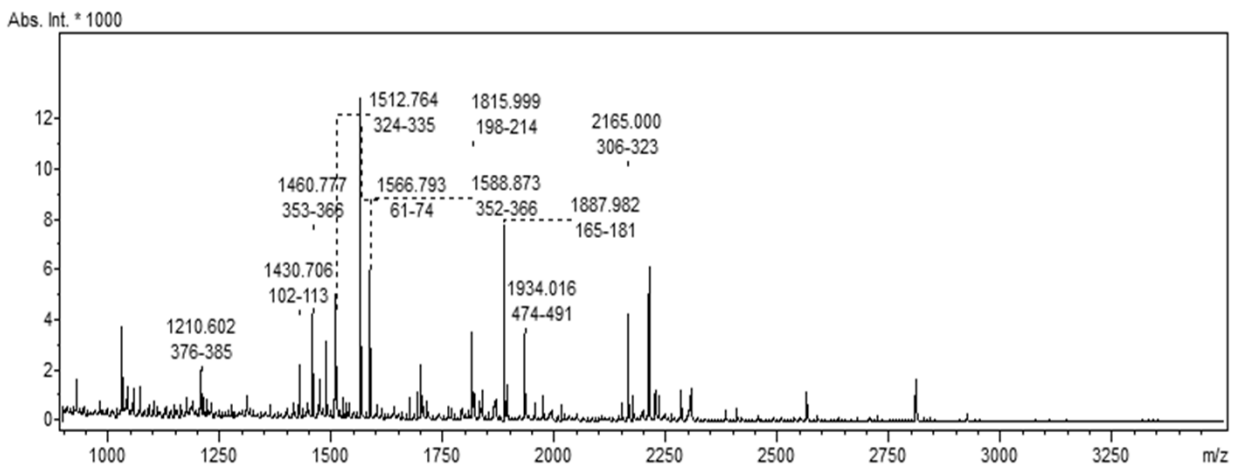

### A representative MALDI-ToF PMF spectrum of HSPB1

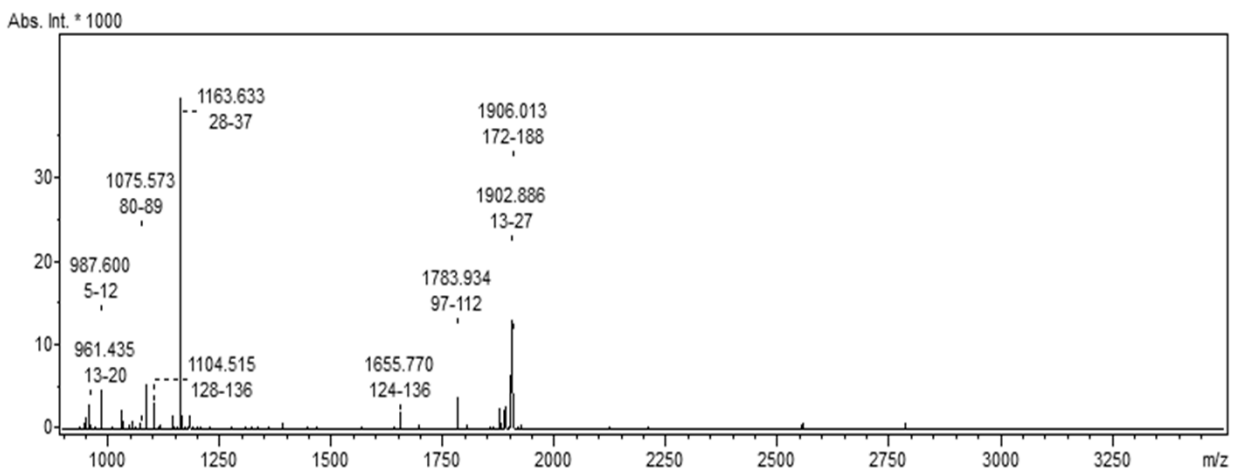

Supplement: JCSM-11-547-s005.pdf [file JCSM-11-547-s005.pdf]
