# Supplementary material for: Comparative proteomic analyses of Duchenne muscular dystrophy and Becker muscular dystrophy muscles: changes contributing to preserve muscle function in Becker muscular dystrophy patients
Source: PubMed Central journal article supplement (PMC7113522; doi:10.1002/jcsm.12527), 2020-01-28
Supplement: JCSM-11-547-s001.pdf [file JCSM-11-547-s001.pdf]

**Table S1** Characteristics of patients involved in the proteomic studies

| Diagnosis | ID | Age      | Genotyping (if present) | Ambulant | Treatment with corticosteroids | B blockers | ACE inhibitors |
|-----------|----|----------|-------------------------|----------|--------------------------------|------------|----------------|
| DMD       | 1  | 1        | del 3-12                | yes      | no                             | no         | no             |
| DMD       | 2  | 3        |                         | yes      | no                             | no         | no             |
| DMD       | 3  | 6        | del 50                  | yes      | no                             | no         | no             |
| DMD       | 4  | 5        |                         | yes      | no                             | no         | no             |
| DMD       | 5  | 7        | del 45                  | yes      | no                             | no         | no             |
| DMD       | 6  | 8        | del 3-6                 | yes      | no                             | no         | no             |
| DMD       | 7  | 3        | del 45                  | yes      | no                             | no         | no             |
| DMD       | 8  | 5        |                         | yes      | no                             | no         | no             |
| DMD       | 9  | 1        | del 44                  | yes      | no                             | no         | no             |
| DMD       | 10 | 1        |                         | yes      | no                             | no         | no             |
| DMD       | 11 | 2        | del 45-52               | yes      | no                             | no         | no             |
| DMD       | 12 | 9 months | del 5-9                 | yes      | no                             | no         | no             |
| DMD       | 13 | 2        | del 22-29               | yes      | no                             | no         | no             |
| DMD       | 14 | 3        | c.5209C>T               | yes      | no                             | no         | no             |
| DMD       | 15 | 6        | del 44                  | yes      | no                             | no         | no             |
| BMD       | 16 | 11       |                         | yes      | no                             | no         | no             |
| BMD       | 17 | 3        | dupl.10-34 e 45-48      | yes      | no                             | no         | no             |
| BMD       | 18 | 4        | del 3-8                 | yes      | no                             | no         | no             |
| BMD       | 19 | 6        | del 48                  | yes      | no                             | no         | no             |
| BMD       | 20 | 6        |                         | yes      | no                             | no         | no             |
| BMD       | 21 | 11       | del 16-29               | yes      | no                             | no         | no             |
| BMD       | 22 | 7        | del 48-51               | yes      | no                             | no         | no             |
| BMD       | 23 | 2        |                         | yes      | no                             | no         | no             |
| BMD       | 24 | 3        |                         | yes      | no                             | no         | no             |
| BMD       | 25 | 4        |                         | yes      | no                             | no         | no             |
| BMD       | 26 | 3        | MLPA negative           | yes      | no                             | no         | no             |
| BMD       | 27 | 3 months | del 3-4                 | yes      | no                             | no         | no             |
| BMD       | 28 | 3        | del 48-51               | yes      | no                             | no         | no             |
| BMD       | 29 | 5        | del 48                  | yes      | no                             | no         | no             |
| BMD       | 30 | 9        | del 48                  | yes      | no                             | no         | no             |
| CTRL      | 31 | 5        |                         |          |                                |            |                |
| CTRL      | 32 | 3        |                         |          |                                |            |                |
| CTRL      | 33 | 9        |                         |          |                                |            |                |
| CTRL      | 34 | 4        |                         |          |                                |            |                |
| CTRL      | 35 | 6        |                         |          |                                |            |                |
| CTRL      | 36 | 10       |                         |          |                                |            |                |
| CTRL      | 37 | 6        |                         |          |                                |            |                |
| CTRL      | 38 | 7        |                         |          |                                |            |                |
| CTRL      | 39 | 5        |                         |          |                                |            |                |
| CTRL      | 40 | 5        |                         |          |                                |            |                |
| CTRL      | 41 | 11       |                         |          |                                |            |                |
| CTRL      | 42 | 13       |                         |          |                                |            |                |
| CTRL      | 43 | 4        |                         |          |                                |            |                |
| CTRL      | 44 | 6        |                         |          |                                |            |                |
| CTRL      | 45 | 6        |                         |          |                                |            |                |
