# Supplementary material for: Comparative proteomic analyses of Duchenne muscular dystrophy and Becker muscular dystrophy muscles: changes contributing to preserve muscle function in Becker muscular dystrophy patients
Source: PubMed Central journal article supplement (PMC7113522; doi:10.1002/jcsm.12527), 2020-01-28
Supplement: JCSM-11-547-s003.pdf [file JCSM-11-547-s003.pdf]

**Table S3. Changed spots in 2D-DIGE analysis.**

**a. Spot significantly changed (ANOVA + Tukey, p<0.01) in DMD vs. BMD**

| Gene symbol | UniprotKB AC n° | Description                                                                      | Molecular function                                    | Av. volumes |         |         |         |         | % variation |         |         | ANOVA  | Tukey HSD |         |         | Kruskal-Wallis | MW (kDa) | pI   | Searched peptides | Matched peptides | Mascot Score | sequence coverage (%) |      |
|-------------|-----------------|----------------------------------------------------------------------------------|-------------------------------------------------------|-------------|---------|---------|---------|---------|-------------|---------|---------|--------|-----------|---------|---------|----------------|----------|------|-------------------|------------------|--------------|-----------------------|------|
|             |                 |                                                                                  |                                                       | CTR/L       | BMD     | DMD     | DMD/CTR | BMD/BMD | DMD/CTR     | BMD/CTR | DMD/BMD |        | CTR-L     | CTR-BMD | BMD-DMD |                |          |      |                   |                  |              |                       |      |
| MTLS        | P08504          | slow skeletal ventricular myosin alkali light chain 3                            | Structural and contractile proteins (thick filaments) | 185.675     | 110.602 | 87.500  | 0.353   | 0.583   | 0.606       | -54.7   | -47.7   | -39.4  | 0.000     | 0.000   | 0.000   | 0.000          | 0.000    | 22.1 | 4.9               | 23               | 12           | 194                   | 58.5 |
| TNNT3       | P43378          | troponin T, fast skeletal muscle                                                 | Structural and contractile proteins (thin filaments)  | 32.501      | 44.786  | 20.301  | 0.625   | 1.378   | 0.453       | -37.5   | -37.5   | -37.5  | 0.000     | 0.005   | 0.001   | 0.000          | 0.000    | 28.4 | 9.8               | 22               | 9            | 126                   | 38.1 |
| TNNT2       | P48788          | troponin I, skeletal, fast                                                       | Structural and contractile proteins (thin filaments)  | 19.299      | 36.411  | 24.590  | 1.274   | 1.887   | 0.675       | 27.4    | 38.7    | 32.5   | 0.000     | 0.301   | 0.000   | 0.004          | 0.001    | 22.6 | 10                | 15               | 9            | 101                   | 51.1 |
| PFYCM       | P11217          | glycogen phosphorylase                                                           | Glycogen/glucose metabolism                           | 0.980       | 0.548   | 0.263   | 0.306   | 0.635   | 0.482       | -69.4   | -36.5   | -51.6  | 0.000     | 0.000   | 0.001   | 0.001          | 0.000    | 97.5 | 6.5               | 43               | 34           | 382                   | 47.5 |
| ALDOA       | P04075          | aldolase A                                                                       | Glycogen/glucose metabolism (Glycolysis)              | 95.741      | 55.909  | 35.929  | 0.375   | 0.584   | 0.643       | -62.5   | -41.6   | -35.7  | 0.000     | 0.000   | 0.000   | 0.003          | 0.000    | 39.9 | 9.2               | 43               | 22           | 279                   | 65.4 |
| ALDOA       | P04075          | aldolase A                                                                       | Glycogen/glucose metabolism (Glycolysis)              | 75.528      | 58.162  | 31.487  | 0.417   | 0.770   | 0.541       | -58.3   | -45.9   | -23.0  | 0.000     | 0.000   | 0.008   | 0.000          | 0.000    | 97.9 | 9.2               | 34               | 21           | 288                   | 65.4 |
| PGK1        | P00558          | phosphoglycerate kinase 1                                                        | Glycogen/glucose metabolism (Glycolysis)              | 14.059      | 7.834   | 2.895   | 0.206   | 0.557   | 0.370       | -79.4   | -44.3   | -63.0  | 0.000     | 0.000   | 0.000   | 0.000          | 0.000    | 45.5 | 9.2               | 26               | 15           | 169                   | 44.4 |
| TPH1        | P60174          | triosephosphate isomerase                                                        | Glycogen/glucose metabolism (Glycolysis)              | 25.219      | 13.649  | 9.169   | 0.364   | 0.541   | 0.672       | -53.6   | -45.9   | -32.9  | 0.000     | 0.000   | 0.000   | 0.008          | 0.000    | 26.3 | 6.5               | 19               | 14           | 247                   | 57.8 |
| TPH1        | P60174          | triosephosphate isomerase                                                        | Glycogen/glucose metabolism (Glycolysis)              | 11.955      | 7.133   | 2.794   | 0.234   | 0.597   | 0.370       | -63.0   | -40.3   | -63.0  | 0.000     | 0.000   | 0.000   | 0.000          | 0.000    | 26.8 | 6.5               | 38               | 12           | 145                   | 55.6 |
| PGM1        | P36871          | phosphoglucomutase 1                                                             | Glycogen/glucose metabolism (Glycolysis)              | 0.640       | 1.740   | 1.114   | 1.742   | 2.720   | 0.640       | 74.2    | 172.0   | -36.0  | 0.000     | 0.013   | 0.000   | 0.001          | 0.000    | 61.7 | 6.3               | 22               | 17           | 217                   | 35.9 |
| PGM2        | P14259          | phosphoglucomutase 2                                                             | Glycogen/glucose metabolism (Glycolysis)              | 14.868      | 11.483  | 4.715   | 0.317   | 0.772   | 0.411       | -66.9   | -42.9   | -59.9  | 0.000     | 0.000   | 0.072   | 0.000          | 0.000    | 28.6 | 9.5               | 19               | 241          | 59.3                  |      |
| MDH1        | P49225          | cytosolic malate dehydrogenase                                                   | TCA cycle                                             | 1.414       | 3.534   | 1.938   | 1.370   | 2.500   | 0.640       | 37.0    | 160.0   | -36.0  | 0.000     | 0.001   | 0.000   | 0.000          | 0.000    | 31.9 | 8.8               | 24               | 11           | 128                   | 46.4 |
| SDHA        | P31040          | succinate dehydrogenase [ubiquinone] flavoprotein subunit, mitochondrial prec    | TCA cycle                                             | 0.656       | 1.122   | 0.711   | 1.083   | 1.709   | 0.634       | 8.3     | 70.9    | -36.6  | 0.000     | 0.839   | 0.000   | 0.000          | 0.001    | 68.3 | 9.4               | 26               | 19           | 273                   | 46.3 |
| SUCLA2      | Q09297          | succinate-CoA ligase, ADP-forming, beta subunit                                  | TCA cycle                                             | 0.987       | 1.905   | 0.857   | 0.858   | 1.929   | 0.450       | -13.2   | 62.8    | -36.6  | 0.000     | 0.725   | 0.000   | 0.000          | 0.000    | 48.4 | 6.8               | 22               | 10           | 100                   | 15.8 |
| ATP5B       | Q02087          | mitochondrial ATP synthase, H <sup>+</sup> -transporting F1 complex beta subunit | Respiratory chain/ATP synthesis                       | 0.617       | 2.876   | 1.779   | 2.885   | 4.664   | 0.619       | 188.5   | 366.4   | -36.6  | 0.000     | 0.000   | 0.000   | 0.000          | 0.000    | 48.1 | 4.8               | 30               | 21           | 238                   | 49.4 |
| GOT1        | P17174          | aspartate aminotransferase 1                                                     | aminoacid metabolism                                  | 2.570       | 2.134   | 1.119   | 0.435   | 0.830   | 0.524       | -56.5   | -17.0   | -47.6  | 0.000     | 0.000   | 0.295   | 0.004          | 0.002    | 46.4 | 6.6               | 22               | 13           | 190                   | 34.1 |
| GOT2        | P00505          | aspartate aminotransferase 2 precursor                                           | aminoacid metabolism                                  | 1.735       | 1.313   | 0.465   | 0.263   | 0.757   | 0.347       | -73.7   | -47.6   | -60.5  | 0.000     | 0.000   | 0.097   | 0.000          | 0.000    | 47.9 | 9.1               | 30               | 14           | 155                   | 46   |
| CA3         | P07451          | carbonic anhydrase 3                                                             | response to stress                                    | 20.663      | 62.706  | 43.391  | 2.098   | 3.035   | 0.691       | 105.6   | 233.9   | -30.3  | 0.000     | 0.000   | 0.000   | 0.000          | 0.000    | 29.7 | 7.1               | 33               | 8            | 136                   | 45.6 |
| PRDX6       | P30041          | peroxiredoxin 6                                                                  | response to stress                                    | 2.280       | 4.135   | 3.162   | 1.387   | 1.814   | 0.765       | 38.7    | 81.4    | -23.5  | 0.000     | 0.006   | 0.000   | 0.001          | 0.001    | 25.1 | 6                 | 22               | 12           | 187                   | 49.1 |
| CRYAB       | P02511          | alpha-crystallin B chain                                                         | response to stress                                    | 0.885       | 1.245   | 0.707   | 0.799   | 1.407   | 0.568       | -20.1   | 40.7    | -43.2  | 0.000     | 0.121   | 0.001   | 0.000          | 0.001    | 20.1 | 6.9               | 33               | 12           | 165                   | 50.3 |
| HSPA2       | P54652          | heat shock-related 70 kDa protein 2                                              | response to stress                                    | 1.770       | 6.169   | 2.412   | 1.363   | 3.486   | 0.391       | 36.3    | 246.6   | -60.6  | 0.000     | 0.546   | 0.000   | 0.000          | 0.000    | 70.3 | 5.4               | 33               | 15           | 151                   | 25.8 |
| SOD2        | P04179          | manganese-containing superoxide dismutase                                        | response to stress                                    | 1.540       | 2.770   | 1.248   | 0.810   | 1.799   | 0.450       | -19.0   | 73.9    | -55.0  | 0.000     | 0.388   | 0.000   | 0.000          | 0.000    | 19.8 | 8.9               | 12               | 5            | 75.5                  | 31.3 |
| SOD2        | P04179          | manganese-containing superoxide dismutase                                        | response to stress                                    | 5.280       | 9.976   | 5.094   | 0.965   | 1.899   | 0.511       | -3.5    | 82.8    | -48.0  | 0.000     | 0.978   | 0.000   | 0.000          | 0.000    | 22.3 | 7                 | 14               | 5            | 75.4                  | 27.8 |
| SEPRNA1     | P01009          | alpha-1-antitrypsin                                                              | response to stress                                    | 2.511       | 3.890   | 6.537   | 2.603   | 1.549   | 1.890       | 169.8   | 68.0    | -48.0  | 0.000     | 0.000   | 0.172   | 0.003          | 0.001    | 44.3 | 5.3               | 21               | 8            | 63.1                  | 23.1 |
| MB          | P02144          | myoglobin                                                                        | transport                                             | 438.475     | 336.919 | 124.976 | 0.287   | 0.774   | 0.371       | -71.3   | -62.9   | -62.9  | 0.000     | 0.000   | 0.001   | 0.000          | 0.000    | 17.2 | 7.9               | 13               | 8            | 128                   | 55.8 |
| ALB         | P02768          | serum albumin precursor                                                          | transport                                             | 28.914      | 57.537  | 120.990 | 4.184   | 1.990   | 2.103       | 318.4   | 110.3   | -110.3 | 0.000     | 0.000   | 0.003   | 0.000          | 0.000    | 71.3 | 6.1               | 34               | 21           | 223                   | 32   |
| TF          | P02787          | transferrin                                                                      | transport                                             | 4.897       | 8.005   | 16.099  | 3.369   | 1.636   | 2.061       | 236.3   | 63.6    | -63.6  | 0.000     | 0.000   | 0.007   | 0.000          | 0.000    | 79.3 | 6.8               | 28               | 37           | 378                   | 39.4 |
| TF          | P02787          | transferrin                                                                      | transport                                             | 1.807       | 6.729   | 11.745  | 6.501   | 3.725   | 1.746       | 550.1   | 272.5   | 74.6   | 0.000     | 0.000   | 0.000   | 0.000          | 0.000    | 74.3 | 6.7               | 27               | 19           | 237                   | 31.8 |
| TF          | P02787          | transferrin                                                                      | transport                                             | 0.670       | 2.753   | 4.175   | 6.235   | 4.112   | 1.516       | 523.3   | 311.2   | 81.6   | 0.000     | 0.000   | 0.000   | 0.002          | 0.000    | 79.3 | 7                 | 27               | 19           | 239                   | 26.6 |

**b. Other spots significantly changed vs. CTR, but not in DMD vs. BMD**

| Gene symbol | UniprotKB AC n° | Description                                                 | Molecular function                                                      | Av. volumes |        |        |         |         | % variation |         |         | ANOVA | Tukey HSD |         |         | Kruskal-Wallis | MW (kDa) | pI   | Searched peptides | Matched peptides | Mascot Score | sequence coverage (%) |      |
|-------------|-----------------|-------------------------------------------------------------|-------------------------------------------------------------------------|-------------|--------|--------|---------|---------|-------------|---------|---------|-------|-----------|---------|---------|----------------|----------|------|-------------------|------------------|--------------|-----------------------|------|
|             |                 |                                                             |                                                                         | CTR/L       | BMD    | DMD    | DMD/CTR | BMD/BMD | DMD/CTR     | BMD/CTR | DMD/BMD |       | CTR-L     | CTR-BMD | BMD-DMD |                |          |      |                   |                  |              |                       |      |
| CSN         | P03536          | gelsolin isoform b                                          | Structural and contractile proteins                                     | 0.178       | 0.616  | 0.535  | 3.014   | 3.466   | 0.870       | 201.4   | 266.6   | -13.0 | 0.000     | 0.002   | 0.000   | 0.582          | 0.002    | 86   | 5.9               | 18               | 12           | 126                   | 10.5 |
| DES         | P17661          | desmin                                                      | Structural and contractile proteins (intermediate filament)             | 2.454       | 4.836  | 5.298  | 2.134   | 1.971   | 1.083       | 113.4   | 8.3     | 8.3   | 0.000     | 0.000   | 0.000   | 0.692          | 0.001    | 53.6 | 5.1               | 40               | 28           | 312                   | 49.4 |
| DES         | P17661          | desmin                                                      | Structural and contractile proteins (intermediate filament)             | 0.727       | 2.379  | 2.609  | 3.590   | 3.273   | 1.097       | 259.0   | 227.3   | 8.7   | 0.000     | 0.000   | 0.000   | 0.719          | 0.001    | 53.6 | 5.1               | 50               | 35           | 386                   | 58.3 |
| MYH2        | Q9JUK2          | myosin-2                                                    | Structural and contractile proteins (thick filaments)                   | 0.661       | 1.831  | 2.028  | 3.068   | 2.769   | 1.108       | 206.8   | 176.9   | 10.8  | 0.000     | 0.000   | 0.002   | 0.759          | 0.001    | 80.1 | 6.1               | 21               | 11           | 109                   | 18.1 |
| ACTA1       | P68133          | alpha 1 actin precursor                                     | Structural and contractile proteins (thin filaments)                    | 23.402      | 63.076 | 45.015 | 1.924   | 2.734   | 0.704       | 92.4    | 299.6   | 15.4  | 0.000     | 0.008   | 0.000   | 0.013          | 0.000    | 42.4 | 5.1               | 36               | 19           | 193                   | 46.4 |
| ACTA1       | P68133          | alpha 1 actin precursor                                     | Structural and contractile proteins (thin filaments)                    | 0.968       | 3.528  | 3.937  | 4.068   | 3.646   | 1.116       | 306.6   | 264.6   | 11.6  | 0.000     | 0.000   | 0.000   | 0.083          | 0.000    | 42.4 | 5.1               | 18               | 14           | 199                   | 35.5 |
| ACTA1       | P68133          | alpha 1 actin precursor                                     | Structural and contractile proteins (thin filaments)                    | 0.440       | 2.645  | 2.974  | 6.764   | 6.017   | 1.124       | 176.4   | 501.7   | 12.4  | 0.000     | 0.000   | 0.000   | 0.178          | 0.000    | 42.4 | 5.1               | 39               | 19           | 173                   | 45.6 |
| ACTA1       | P68133          | alpha 1 actin precursor                                     | Structural and contractile proteins (thin filaments)                    | 0.543       | 1.441  | 1.701  | 3.130   | 2.851   | 1.181       | 213.0   | 165.1   | 18.1  | 0.000     | 0.000   | 0.000   | 0.290          | 0.001    | 42.4 | 5.1               | 41               | 16           | 161                   | 45.6 |
| ACTA1       | P68133          | alpha 1 actin precursor                                     | Structural and contractile proteins (thin filaments)                    | 0.831       | 2.754  | 2.653  | 3.191   | 3.313   | 0.963       | 210.1   | 231.3   | -3.7  | 0.000     | 0.000   | 0.000   | 0.827          | 0.001    | 42.4 | 5.1               | 29               | 14           | 143                   | 37.7 |
| FHL1        | Q13842          | four and a half LIM domains 1 variant                       | Structural and contractile proteins (muscle development or hypertrophy) | 5.111       | 6.974  | 5.859  | 1.146   | 1.364   | 0.840       | 14.6    | 38.4    | -16.0 | 0.007     | 0.366   | 0.006   | 0.092          | 0.004    | 35.5 | 10.1              | 30               | 15           | 207                   | 47.6 |
| LD33        | Q75112          | LIM domain binding 3 isoform 4                              | Structural and contractile proteins (Z-disk)                            | 5.388       | 10.452 | 7.798  | 1.302   | 1.745   | 0.746       | 30.2    | 54.6    | -25.4 | 0.002     | 0.229   | 0.001   | 0.044          | 0.006    | 31   | 9.6               | 21               | 11           | 167                   | 35   |
| MYLFP       | Q98A32          | myosin regulatory light chain 2, skeletal muscle isoform    | Structural and contractile proteins (thick filaments)                   | 47.656      | 60.915 | 81.564 | 1.712   | 1.278   | 1.339       | 71.2    | 27.8    | -62.9 | 0.000     | 0.000   | 0.183   | 0.016          | 0.003    | 19.2 | 4.7               | 11               | 9            | 138                   | 44.1 |
| ENO3        | P13929          | enolase 3 (beta, muscle)                                    | Glycogen/glucose metabolism (Glycolysis)                                | 111.828     | 51.172 | 34.233 | 0.306   | 0.458   | 0.659       | -69.4   | -44.2   | -33.1 | 0.000     | 0.000   | 0.000   | 0.063          | 0.000    | 47.2 | 8.6               | 21               | 11           | 158                   | 33.6 |
| PKM2        | P14618          | pyruvate kinase 3 isoform 2                                 | Glycogen/glucose metabolism (Glycolysis)                                | 28.663      | 15.839 | 9.945  | 0.347   | 0.553   | 0.628       | -65.3   | -37.2   | -44.8 | 0.000     | 0.000   | 0.000   | 0.056          | 0.000    | 58.5 | 9.7               | 44               | 21           | 197                   | 38.9 |
| GAPDH       | P04406          | glyceraldehyde-3-phosphate dehydrogenase                    | Glycogen/glucose metabolism (Glycolysis)                                | 83.541      | 59.136 | 48.984 | 0.586   | 0.708   | 0.828       | -41.4   | -29.2   | -17.2 | 0.001     | 0.000   | 0.011   | 0.342          | 0.003    | 36.2 | 9.1               | 27               | 12           | 182                   | 44.2 |
| DH2         | P48735          | isocitrate dehydrogenase 2 (NADP+), mitochondrial precursor | TCA cycle                                                               | 4.150       | 0.529  | 0.456  |         |         |             |         |         |       |           |         |         |                |          |      |                   |                  |              |                       |      |
