# Supplementary material for: Comparative proteomic analyses of Duchenne muscular dystrophy and Becker muscular dystrophy muscles: changes contributing to preserve muscle function in Becker muscular dystrophy patients
Source: PubMed Central journal article supplement (PMC7113522; doi:10.1002/jcsm.12527), 2020-01-28

**Figure S6.** Protein validation by immunoblotting. Representative histograms and immunoblot images of mitochondrial aconitase (ACO2), creatine kinase M-type (CKM), L-lactate dehydrogenase A chain (LDHA), succinate dehydrogenase flavoprotein subunit (SDHA), alpha-crystallin B chain (CRYAB) and vimentin (VIM) (n=3; mean  $\pm$  S.D.; ANOVA and Tukey's test,  $p < 0.05$ ) in BMD (black bars) and DMD (gray bars) patients and healthy controls (white bars).

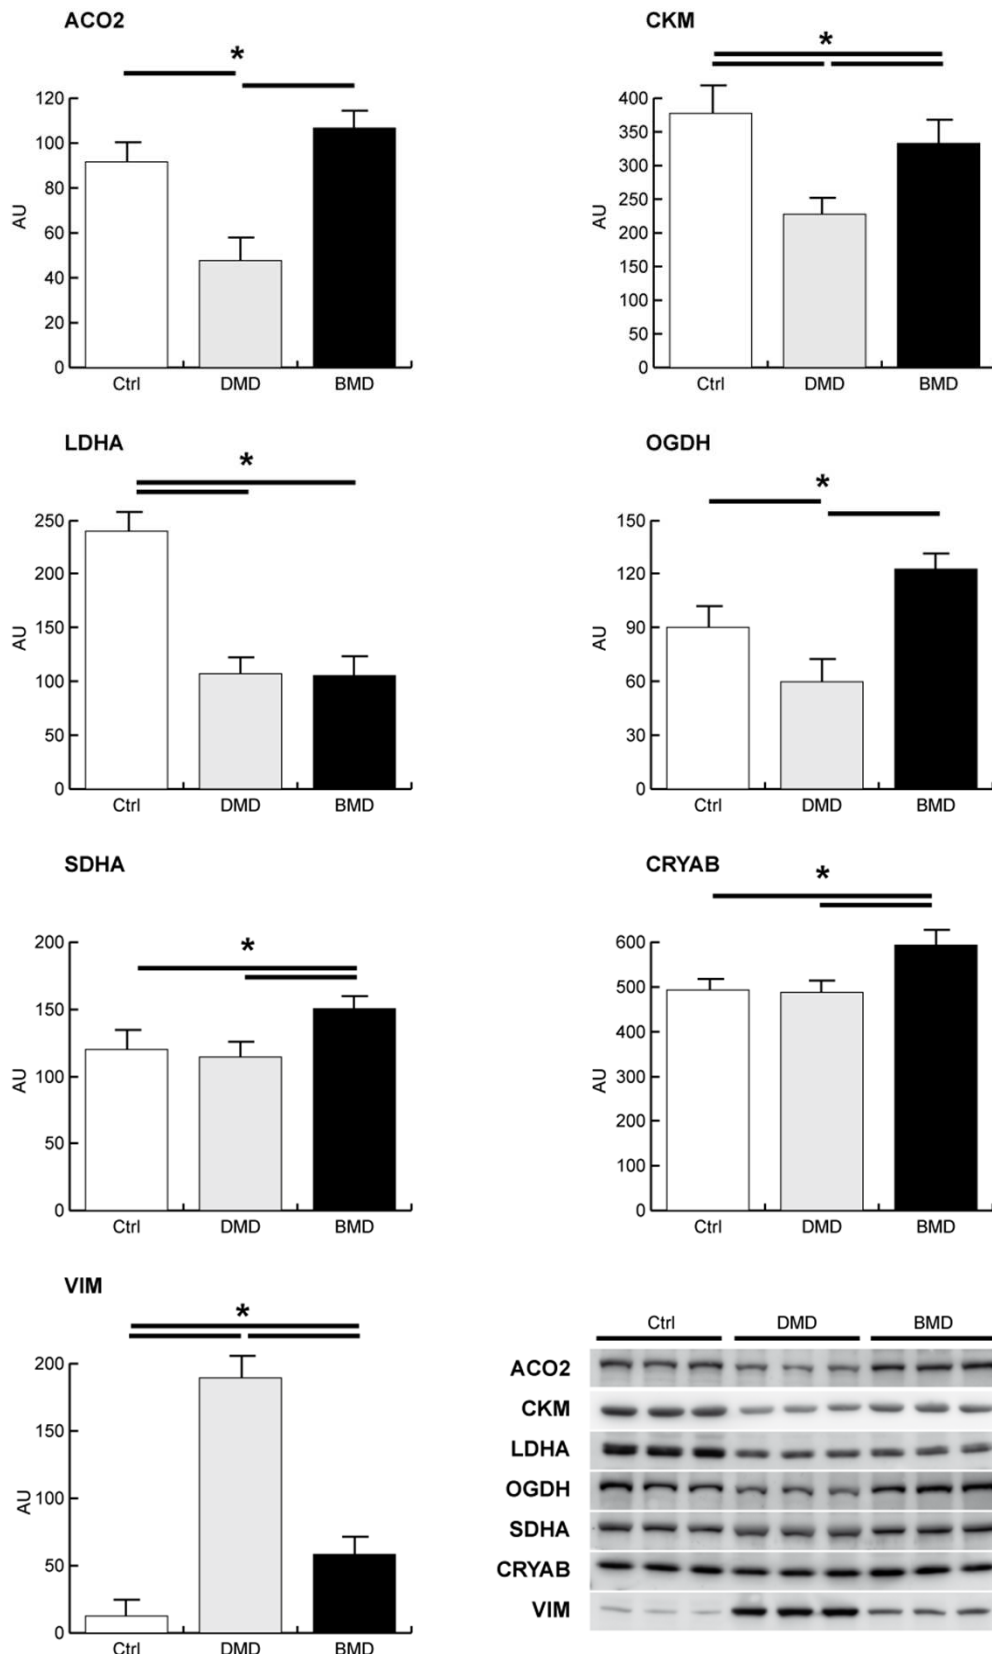

Supplement: JCSM-11-547-s006.pdf [file JCSM-11-547-s006.pdf]
