# Supplementary material for: Comparative proteomic analyses of Duchenne muscular dystrophy and Becker muscular dystrophy muscles: changes contributing to preserve muscle function in Becker muscular dystrophy patients
Source: J Cachexia Sarcopenia Muscle. 2020 Jan 28;11(2):547–63. doi: 10.1002/jcsm.12527 (PMC7113522; doi:10.1002/jcsm.12527)
Supplement: Supplementary file 4 — Table S4. Changed proteins in label‐free LC‐MS/MS analysis [file JCSM-11-547-s004.pdf]

a. Proteins significantly changed (ANOVA + Tukey,  $p < 0.05$ ) in DMD vs. BMD

[illegible]

Legend:

|                                                                     |
|---------------------------------------------------------------------|
| Significant Increment in protein abundance (Tukey HSD, $p < 0.01$ ) |
| Significant Decrement in protein abundance (Tukey HSD, $p < 0.01$ ) |
| Tendential Increment in protein abundance (Tukey HSD, $p < 0.01$ )  |
| Tendential Decrement in protein abundance (Tukey HSD, $p < 0.01$ )  |
